# Supplementary material
Source: publisher figshare collection journal article supplement (https://future-science-group.figshare.com/ndownloader/files/30640428)
Supplement: Supplementary file 1 [file 30640428]

## Sheet: Table S2
Characteristics	Hazard.Ratio	CI95	P.value
cg02927327	18.2389	5.3901-61.7164	0
cg23213449	15.3421	4.2989-54.753	3e-05
cg05583848	12.7876	3.6714-44.5392	6e-05
cg07112604	49.0977	7.2344-333.2102	7e-05
cg00237391	7.9254	2.833-22.1716	8e-05
cg01067724	3263060000000	1507008.9784-7065353791002240000	0.00011
cg15877936	0.0851	0.0237-0.3059	0.00016
cg19741167	4.2926	1.9671-9.3675	0.00025
cg25220781	46.7808	5.8948-371.2515	0.00027
cg27468419	5.9132	2.2669-15.4247	0.00028
cg25553110	272665	280.5126-265036174.956	0.00036
cg11539066	0.0872	0.0227-0.3351	0.00038
cg09391979	0	0-0	0.00044
cg27321913	15.4156	3.3506-70.9242	0.00044
cg07628771	0.085	0.0215-0.3369	0.00045
cg15150472	1952.1	27.1816-140194.3186	0.00051
cg04456916	0.133	0.0423-0.4177	0.00055
cg10529662	0.0461	0.008-0.2651	0.00057
cg20367961	38.2058	4.8028-303.9225	0.00058
cg13665021	0.046	0.0079-0.2695	0.00064
cg03820828	0.1151	0.0332-0.399	0.00065
cg20685981	64.6388	5.8532-713.8218	0.00067
cg14018959	22.7994	3.7541-138.4671	0.00068
cg08279008	3.5054	1.6971-7.2403	0.0007
cg20068463	943959000000000	1885322.5647-4.72628957089111e+23	0.00074
cg00080418	76.6015	6.1024-961.5626	0.00078
cg27585287	1874.14	23.1009-152046.1026	0.00078
cg08689926	0.0072	4e-04-0.1319	0.00087
cg24311704	13.7377	2.9129-64.7886	0.00093
cg21988465	0.1288	0.0382-0.4339	0.00094
cg07309576	0.1471	0.0472-0.4584	0.00095
cg10999347	0.2125	0.0845-0.5345	0.001
cg07252166	0.0504	0.0084-0.3014	0.00106
cg02212000	73.9739	5.609-975.6014	0.00107
cg12103840	0	0-0	0.0011
cg23476065	13.7722	2.8453-66.6627	0.00112
cg08939521	0.1162	0.0316-0.4269	0.00119
cg09988116	14.5581	2.8817-73.5456	0.00119
cg09647033	4841.25	28.0853-834518.5437	0.00124
cg13626585	0.0349	0.0045-0.2675	0.00124
cg13297560	4.8365	1.8568-12.5976	0.00125
cg08570226	195.095	7.9178-4807.1782	0.00126
cg24527881	13.6294	2.7703-67.0544	0.00131
cg15889804	0.0091	5e-04-0.1638	0.00143
cg04869514	0.0594	0.0105-0.3378	0.00145
cg09493063	0.2973	0.1397-0.6325	0.00164
cg08621441	28.2514	3.5245-226.4562	0.00165
cg04583874	0.1692	0.0558-0.5124	0.00168
cg22992009	0.0047	2e-04-0.1331	0.00168
cg13611989	634.168	11.2785-35657.9537	0.0017
cg26527984	23.7895	3.2714-172.9977	0.00174
cg12705353	7.2451	2.083-25.2	0.00185
cg22450733	3572.92	20.7097-616415.4499	0.00185
cg24359323	0.2365	0.0954-0.5865	0.00186
cg08323969	14.8935	2.6901-82.4557	0.00198
cg21556223	8.5433	2.1842-33.4164	0.00205
cg03649030	33.1102	3.5594-307.9947	0.0021
cg22805152	119503	67.2105-212481685.9543	0.0022
cg11024728	0.1241	0.0325-0.4744	0.00229
cg03890988	51.1975	4.0745-643.3142	0.00231
cg07658681	0.1679	0.0527-0.5351	0.00255
cg17156862	17.2792	2.7025-110.4772	0.00261
cg26551200	7.8126	2.0403-29.9158	0.00269
cg21150302	0.0261	0.0024-0.2847	0.00278
cg07204937	19980.5	29.9055-13349369.7023	0.00285
cg06252985	18.8636	2.7369-130.0164	0.00286
cg21588307	124.191	5.1758-2979.89	0.00294
cg19431244	882.524	10.0665-77370.0759	0.00296
cg00697642	1229.35	11.2211-134684.9764	0.00299
cg03138364	7.4897	1.9805-28.3231	0.00301
cg16409261	0.2008	0.0695-0.5802	0.00302
cg20759486	8.4001	2.057-34.303	0.00303
cg24685837	77.6258	4.3529-1384.3146	0.00307
cg08174003	899.234	9.7908-82590.0723	0.00319
cg21644826	4847.25	17.184-1367304.0309	0.0032
cg13525071	0.1603	0.0472-0.545	0.00336
cg04818594	0.1919	0.0637-0.5786	0.00337
cg14904814	0.0911	0.0183-0.4531	0.00342
cg17741572	5.6705	1.7646-18.2213	0.00357
cg27280332	0.1175	0.0278-0.4971	0.00362
cg26540559	0.1019	0.0218-0.4769	0.00373
cg06917231	0.0001	0-0.0419	0.00375
cg06024099	41.8661	3.3382-525.0646	0.0038
cg23913679	0.0576	0.0083-0.3996	0.00387
cg22159171	0.0655	0.0103-0.4168	0.00389
cg23854488	0.2916	0.1262-0.6737	0.00392
cg11194925	3.7365	1.5254-9.1524	0.00393
cg22795610	10.3636	2.1143-50.7976	0.00394
cg10952649	199.609	5.3995-7379.1662	0.00403
cg08641579	0.2133	0.0743-0.6122	0.00408
cg04552625	0.2101	0.0723-0.6108	0.00416
cg10061384	17.0701	2.429-119.9636	0.00434
cg12208770	15.8795	2.3745-106.1939	0.00435
cg18398058	0.0719	0.0118-0.439	0.00435
cg13526221	0.0847	0.0155-0.4634	0.00441
cg03138928	5.1387	1.6645-15.864	0.00443
cg04050315	0.0247	0.0019-0.3159	0.00443
cg20401434	874.363	8.2312-92879.9425	0.00443
cg12218389	25.9547	2.7463-245.2933	0.00449
cg09788492	0.2569	0.1005-0.6568	0.00455
cg00855396	0.04	0.0043-0.3699	0.00456
cg16731692	341.689	6.0439-19317.2667	0.0046
cg13990743	5.862	1.7142-20.0458	0.00482
cg17575721	0.0524	0.0067-0.4093	0.00492
cg10926330	20.7514	2.5048-171.9205	0.00494
cg17896573	0.0034	1e-04-0.1809	0.00502
cg03333116	429.828	6.1938-29828.6442	0.00506
cg04132379	8.981	1.9273-41.8503	0.00518
cg12003822	0.036	0.0035-0.3713	0.00523
cg04652097	0.3165	0.1406-0.7126	0.00547
cg15591198	185990	35.0851-985951784.1484	0.00555
cg08847944	0.2029	0.0657-0.6267	0.00557
cg22535359	0.0844	0.0147-0.4861	0.00565
cg10534490	7.8636	1.8217-33.9443	0.00571
cg17896927	4.0357	1.4996-10.861	0.00574
cg10793646	137.973	4.1552-4581.4162	0.00583
cg14356550	7.0923	1.7597-28.585	0.00588
cg02032488	0.0242	0.0017-0.3429	0.00594
cg14160480	13.3658	2.0966-85.2053	0.00608
cg25316429	0.0902	0.0161-0.5045	0.00617
cg19779810	0.2324	0.0817-0.6605	0.00618
cg15440392	41127.7	20.0533-84349602.2375	0.00632
cg08404354	7.2569	1.7449-30.1811	0.00642
cg04770504	0.1357	0.0322-0.5715	0.00648
cg20702205	10.0748	1.9096-53.1539	0.00648
cg19106968	4.0615	1.4802-11.1441	0.0065
cg11316503	6.1847	1.663-23.0011	0.00655
cg11554975	0.0983	0.0185-0.5233	0.00655
cg02574703	0.0304	0.0024-0.3792	0.00667
cg11790673	7.4708	1.7475-31.9379	0.00667
cg12806353	6.791	1.6978-27.1634	0.00676
cg01301885	0.2218	0.0745-0.66	0.0068
cg09663530	37.7534	2.718-524.3937	0.00683
cg02690648	260.309	4.6069-14708.4979	0.00689
cg08699794	71.4205	3.1856-1601.2518	0.00714
cg25382352	0.0615	0.008-0.4703	0.00721
cg21243068	1303.24	6.9306-245062.2307	0.00726
cg20638016	0.1442	0.035-0.5931	0.00728
cg09467508	0.268	0.1024-0.7013	0.0073
cg01597066	2.7384	1.3097-5.7259	0.00743
cg06792340	0.1281	0.0284-0.5767	0.00743
cg20345923	0.17	0.0464-0.6224	0.00745
cg25201047	0.2345	0.0807-0.681	0.00767
cg08342134	6.8103	1.6586-27.9628	0.00777
cg03078057	0.2112	0.0672-0.664	0.0078
cg10139889	0.0524	0.0059-0.4616	0.0079
cg02845071	97.7268	3.3219-2874.9913	0.00791
cg19292760	11.8679	1.9102-73.7359	0.00795
cg11692070	5.6825	1.5751-20.5009	0.00796
cg11481675	0.1338	0.0302-0.5918	0.00802
cg20660910	149.304	3.6872-6045.6387	0.00803
cg04896437	15.194	2.0161-114.507	0.00828
cg03921696	10.8272	1.8473-63.461	0.00829
cg02930888	0.1796	0.0497-0.6487	0.00878
cg18961546	0.0724	0.01-0.5237	0.0093
cg27052069	0.1199	0.0242-0.5935	0.00934
cg08711724	4.97767e+06	44.0221-562834659863.88	0.00939
cg06008435	8.114	1.6705-39.4105	0.00942
cg17800649	171.6	3.5291-8343.8701	0.00942
cg22444124	3.1465	1.323-7.4834	0.00951
cg02111705	574.954	4.7087-70205.1427	0.00954
cg21028142	6.2869	1.5649-25.2578	0.00957
cg16207991	0.0448	0.0043-0.4698	0.0096
cg01812577	52.7116	2.6176-1061.4879	0.00965
cg09232851	0.1912	0.0546-0.6698	0.0097
cg17195127	35.3339	2.3552-530.107	0.00988
cg23754918	3.7762	1.3709-10.4023	0.01017
cg16261704	0.0096	3e-04-0.3327	0.01025
cg21534578	8.1575	1.6431-40.5004	0.01025
cg10878307	9.2719	1.6911-50.8369	0.01032
cg05599160	3.4257	1.3324-8.8082	0.0106
cg26678920	0.1392	0.0305-0.6357	0.01094
cg20692998	0.2103	0.0633-0.699	0.01095
cg15430422	0.0948	0.0154-0.583	0.01102
cg20471927	173.743	3.2529-9279.8747	0.01105
cg05052324	0.3326	0.1422-0.778	0.01112
cg14452299	0.1749	0.0455-0.6724	0.01116
cg26342985	0.2244	0.0707-0.7125	0.01124
cg21720306	25.3535	2.078-309.3309	0.01131
cg17689721	0.2686	0.097-0.7437	0.01141
cg15417498	90.2416	2.7496-2961.7739	0.01148
cg02999711	4.0785	1.3708-12.1347	0.01151
cg26538335	30.2953	2.1475-427.3889	0.01154
cg02416716	0.1193	0.0229-0.6212	0.01155
cg02176770	273.069	3.5002-21303.6771	0.01162
cg15593510	0.2895	0.1105-0.7585	0.01166
cg24980653	0.4189	0.213-0.8239	0.0117
cg16688232	0	0-0.0021	0.01183
cg05187003	14.5419	1.8082-116.9477	0.01184
cg15269294	1845.13	5.2724-645720.8113	0.01186
cg13851508	0.2382	0.0779-0.7282	0.01187
cg21174841	3.2988	1.2998-8.3719	0.01201
cg10114877	4.8957	1.4149-16.9399	0.01214
cg22632987	10.5733	1.6729-66.825	0.01218
cg07138366	0.2019	0.0577-0.7062	0.01227
cg17257516	6.7984	1.5158-30.4922	0.01231
cg01080357	354.116	3.5539-35284.9145	0.01242
cg21293216	14.2073	1.7724-113.8822	0.01246
cg06139918	0.1775	0.0456-0.6901	0.01259
cg25155846	0.0276	0.0016-0.4635	0.01261
cg10552126	0.2392	0.0777-0.7362	0.01264
cg06657721	3.9465	1.3414-11.6106	0.01265
cg26392439	2587.3	5.3746-1245504.9947	0.01265
cg12475879	0.1948	0.0538-0.705	0.01268
cg22657659	0.1741	0.044-0.6884	0.01269
cg08495341	0.1905	0.0514-0.7056	0.01307
cg13544851	0.0651	0.0075-0.5643	0.01317
cg24767519	0.0818	0.0113-0.5932	0.01326
cg18477949	9.2146	1.5871-53.5014	0.01334
cg05245533	4.7019	1.3785-16.0375	0.01341
cg03549563	0.1055	0.0177-0.6286	0.01352
cg27513097	0.0188	8e-04-0.4418	0.01362
cg21369231	0.0448	0.0038-0.5303	0.01377
cg16646909	19.1124	1.8213-200.5617	0.0139
cg25427625	0.2321	0.0724-0.7444	0.01403
cg27273310	0.1526	0.034-0.6859	0.01422
cg07019835	0.1445	0.0308-0.6787	0.01425
cg03520342	4.7224	1.364-16.3498	0.01429
cg21558893	411.656	3.3337-50831.9578	0.01429
cg11042769	0.2723	0.0961-0.7716	0.01438
cg06512271	0.1512	0.0333-0.6873	0.01447
cg12428447	0.1772	0.0442-0.7095	0.0145
cg15019721	0.2431	0.0782-0.7558	0.01453
cg01558281	33.452	2.0024-558.841	0.01455
cg06291594	15.7592	1.7245-144.0183	0.01458
cg12198704	0.2464	0.0801-0.7586	0.01463
cg13050115	0.0913	0.0134-0.6238	0.01464
cg19673440	0.2415	0.0769-0.7588	0.01499
cg02837536	0.4047	0.1952-0.839	0.01502
cg02283151	29.8201	1.9291-460.9514	0.01509
cg02940362	0.2347	0.0728-0.7564	0.01521
cg07624438	0.0952	0.0143-0.6364	0.01525
cg14066993	9.9894	1.5541-64.2092	0.01533
cg11888738	9.6346	1.5308-60.6365	0.01579
cg00248174	0.1439	0.0297-0.6984	0.01615
cg00574412	6.9034	1.4298-33.3306	0.01617
cg22533689	31.8382	1.889-536.6111	0.01634
cg02325540	0.224	0.0658-0.7622	0.01664
cg04574507	0.3459	0.145-0.8254	0.01673
cg16424196	4.429	1.3073-15.0046	0.01683
cg12019705	0.0624	0.0064-0.6096	0.01705
cg00639041	5644.14	4.6246-6888483.8167	0.01721
cg08638874	0.0486	0.004-0.5852	0.01723
cg00996758	0.2719	0.0931-0.7941	0.01724
cg25363607	0.1018	0.0155-0.6698	0.01745
cg23953820	17.0329	1.6425-176.6361	0.01751
cg15186181	0.3746	0.1664-0.8432	0.01769
cg03357664	11.8553	1.5358-91.5134	0.01772
cg14517359	0.0066	1e-04-0.4194	0.01777
cg11194299	0.1495	0.031-0.721	0.01791
cg06395028	11.8354	1.5284-91.6476	0.01797
cg12619162	11.3447	1.5147-84.9673	0.01807
cg02478603	0.2981	0.1093-0.8131	0.01808
cg26127114	9.8408	1.4762-65.6039	0.01816
cg11376305	2.1356	1.1368-4.0117	0.01834
cg05983695	0.0285	0.0015-0.5487	0.01839
cg21030939	43014001019	61.7951-29940977481310261248	0.01843
cg26288806	38.3062	1.8411-797.0032	0.01857
cg22027946	20.9705	1.6589-265.0858	0.01872
cg14026459	3.5911	1.2365-10.4294	0.01876
cg22613968	5.3596	1.3206-21.7524	0.01882
cg26795340	4.5638	1.2845-16.2156	0.01893
cg17329499	0.1934	0.049-0.7631	0.01897
cg15781316	63.8561	1.9804-2059.0171	0.019
cg13968218	0.1179	0.0197-0.7037	0.01901
cg05647733	5.3287	1.3138-21.6131	0.01918
cg19449172	3.80849e+08	24.5921-5898061818791670	0.01933
cg22020155	3.23667e+07	16.43-63761604634866.5	0.01936
cg26167424	38.5747	1.7906-831.0047	0.01971
cg09068158	7.519	1.3791-40.9944	0.01973
cg04355222	200.39	2.317-17331.0411	0.01985
cg06290476	5368.04	3.8857-7415915.9207	0.01992
cg01595325	0.1144	0.0184-0.7118	0.0201
cg10380643	9.6637	1.4216-65.6918	0.02036
cg13246744	0.1674	0.0369-0.7589	0.02046
cg00929465	0.1819	0.043-0.7688	0.02048
cg12177762	0.0349	0.002-0.5996	0.02076
cg01302136	2.9249	1.1773-7.2667	0.02081
cg02059813	96.8704	1.9982-4696.2297	0.02091
cg21052682	0.317	0.1195-0.8405	0.02094
cg07180212	3.1946	1.1904-8.5731	0.02111
cg02583309	3.1726	1.189-8.4653	0.02113
cg17654585	0.1681	0.0369-0.7654	0.02113
cg04883293	0.2067	0.0541-0.7898	0.02117
cg24465224	3.2626	1.1915-8.9338	0.0214
cg02494781	311.749	2.336-41603.4202	0.02146
cg19158553	0.1116	0.0172-0.7233	0.02147
cg26456404	4.7233	1.2572-17.7456	0.02151
cg06968817	0.1382	0.0255-0.7475	0.02158
cg00492083	439.779	2.4432-79162.1944	0.02161
cg20111340	2653.04	3.1583-2228581.0028	0.02175
cg17741809	2.9933	1.1673-7.6758	0.0225
cg04646186	0.2381	0.0694-0.8168	0.02251
cg13353679	0.2213	0.0605-0.809	0.02258
cg21263567	6.6633	1.3043-34.0394	0.02265
cg07908498	0.1895	0.0453-0.7923	0.02267
cg18584803	0.2292	0.0644-0.816	0.02297
cg26552621	3.4434	1.1854-10.0029	0.02305
cg13550419	4.833	1.2418-18.8091	0.02307
cg20333014	16.6049	1.4711-187.4282	0.02308
cg25319564	0.0765	0.0083-0.7025	0.02308
cg01384290	3.1217	1.169-8.3364	0.02312
cg01405093	2037.67	2.8381-1462987.7853	0.02316
cg01293797	0.196	0.0477-0.8057	0.02385
cg15800421	0.007	1e-04-0.5179	0.02387
cg00002810	0.1842	0.0424-0.8004	0.02401
cg12852210	15.6014	1.4353-169.587	0.02402
cg11677212	0.1288	0.0217-0.7661	0.02426
cg01105140	0.2857	0.096-0.85	0.02431
cg17265788	54.1473	1.6711-1754.4476	0.02449
cg23484278	0.0038	0-0.4914	0.02471
cg11227237	6.60373e+06	7.1856-6068959151887.59	0.025
cg22537474	0.3211	0.1185-0.8696	0.02543
cg03082821	7.6099	1.2833-45.1278	0.02545
cg05240948	0.119	0.0184-0.7706	0.02552
cg05628549	0.225	0.0608-0.8334	0.02556
cg22939193	0.0045	0-0.5174	0.02564
cg20973210	0.2627	0.0812-0.8503	0.0257
cg10822447	266.001	1.9675-35962.3067	0.02573
cg07674386	0.3151	0.1141-0.8703	0.02588
cg07145921	0.1793	0.0395-0.8136	0.02593
cg24679082	1208.71	2.329-627300.5145	0.02608
cg04811540	0.1591	0.0315-0.8038	0.02613
cg25715035	8.1086	1.2803-51.3544	0.02626
cg00983482	0.1948	0.046-0.8249	0.02632
cg20296141	0.1116	0.0161-0.773	0.02637
cg00591844	0.0426	0.0026-0.6925	0.02653
cg26525772	27.5311	1.4708-515.3455	0.02655
cg04122790	74.4654	1.6456-3369.6239	0.02669
cg16689048	5.34243e+06	5.7015-5005934134666.15	0.02724
cg04310247	0.1179	0.0177-0.787	0.02729
cg00683980	0.1759	0.0376-0.8233	0.02732
cg08112737	8.8567	1.2744-61.5517	0.02745
cg27154660	11.9615	1.3175-108.5981	0.02746
cg00706302	8.9241	1.2748-62.4715	0.02749
cg06415710	0.3108	0.1099-0.8786	0.02751
cg20416110	0.1271	0.0202-0.7987	0.02783
cg21897004	10.2072	1.2874-80.9302	0.02787
cg00994583	89.9791	1.6277-4973.9547	0.02795
cg02659402	0.0787	0.0081-0.7614	0.02813
cg10259701	3.0354	1.126-8.183	0.0282
cg27014522	0.2413	0.0677-0.8605	0.02841
cg03020485	0.2043	0.0494-0.8455	0.02842
cg05786361	3656.82	2.367-5649477.3499	0.02853
cg14251173	0.0789	0.0081-0.7663	0.02857
cg02504326	19737.6	2.8021-139029409.0121	0.02868
cg25282783	0.1348	0.0224-0.8119	0.02871
cg02484411	0.3002	0.102-0.8838	0.02894
cg12728517	0.2796	0.0891-0.8777	0.02901
cg06872010	0.2281	0.0605-0.8601	0.02906
cg02326500	0.2812	0.0899-0.8796	0.02923
cg12257394	0.2354	0.064-0.8657	0.02947
cg06492521	30.8185	1.4055-675.7471	0.02955
cg25621182	17.6466	1.3277-234.5361	0.02965
cg15282819	0.2673	0.0813-0.8787	0.02978
cg10176011	20.6079	1.3444-315.8934	0.02982
cg26272270	0.2366	0.0644-0.8688	0.02986
cg17685982	21.4196	1.3449-341.1481	0.03002
cg24547885	2.3032	1.083-4.8982	0.03023
cg04948284	5.1609	1.1677-22.8087	0.03043
cg09925621	895.457	1.9001-421994.7409	0.03044
cg06676088	0.1316	0.021-0.8265	0.03052
cg19477674	7.0689	1.2018-41.5798	0.03052
cg13507429	5.6914	1.1766-27.5316	0.03061
cg22557091	0.2928	0.0961-0.8916	0.03063
cg26106304	4.3856	1.1477-16.7584	0.03067
cg07242860	2.7166	1.0968-6.7283	0.0308
cg10779826	35423.3	2.6324-476682721.0359	0.03081
cg26514492	4.8199	1.1543-20.1258	0.03103
cg18307463	0.2527	0.0723-0.8832	0.0312
cg15728256	0.1692	0.0336-0.8525	0.03129
cg00992090	0.0277	0.0011-0.7309	0.03174
cg10210094	4.5964	1.1423-18.4948	0.03177
cg13169525	58306.5	2.5651-1325373331.076	0.03203
cg27418099	0.0965	0.0114-0.8188	0.0321
cg07015663	7.2627	1.1809-44.6681	0.03241
cg05812437	0.2529	0.0718-0.8914	0.03244
cg02424123	9.7048	1.2048-78.1764	0.03276
cg06288198	0.2188	0.0542-0.884	0.03292
cg04237436	9.4126	1.198-73.9536	0.03303
cg15753394	0.3219	0.1135-0.9131	0.03309
cg22664405	0.3008	0.0995-0.9096	0.03336
cg21541477	0.0202	6e-04-0.7396	0.03366
cg05380846	169.966	1.4808-19508.3098	0.03382
cg07343703	0.2505	0.0698-0.8996	0.03382
cg19439071	3.2874	1.0951-9.868	0.03384
cg03389926	3.1157	1.0897-8.9082	0.03398
cg16500916	5.1209	1.1297-23.2129	0.03416
cg10651583	28.5927	1.2841-636.6774	0.03418
cg16626954	0.25	0.0693-0.9024	0.03428
cg11461875	6.1353	1.1405-33.0058	0.0346
cg25773199	0.1681	0.0321-0.88	0.03475
cg18856043	8.5951	1.1617-63.5939	0.03514
cg25283159	27.9006	1.2456-624.9353	0.03587
cg01050225	0.156	0.0274-0.8874	0.03621
cg25107528	0.1221	0.017-0.8756	0.03642
cg12054521	790782	2.314-270238017326.235	0.03671
cg01337047	3.8143	1.0839-13.4234	0.03703
cg26664206	8.7944	1.1388-67.9164	0.03711
cg12970724	0.0005	0-0.6409	0.0373
cg01039508	12.8283	1.1602-141.8478	0.03742
cg08126560	5.7995	1.1063-30.4033	0.03758
cg24775832	8449.17	1.6787-42525284.3077	0.03761
cg10833014	0.0001	0-0.592	0.03767
cg07930578	17.6373	1.1773-264.2208	0.03769
cg01049205	0.2678	0.0772-0.9284	0.03779
cg02153497	26.5876	1.1935-592.2778	0.03829
cg13381646	1269.82	1.4689-1097722.1038	0.03832
cg16033410	0.043	0.0022-0.8472	0.03855
cg18756060	0	0-0.3697	0.03856
cg24252805	12.1693	1.1404-129.8553	0.03857
cg14624329	0.1871	0.0382-0.9158	0.03859
cg05777658	0	0-0.2422	0.03863
cg03933520	78.1944	1.2533-4878.7243	0.03873
cg18026826	1548.76	1.4632-1639352.0595	0.03873
cg00245778	14.3498	1.1442-179.9661	0.03898
cg19764066	0.2502	0.0671-0.9323	0.03898
cg15229153	974.425	1.4138-671617.0731	0.03904
cg26743569	313947	1.8864-52248977659.292	0.03907
cg22240424	169.338	1.2931-22175.335	0.03908
cg20631335	0	0-0.2439	0.03928
cg01312828	5.0945	1.0822-23.9828	0.03941
cg25865368	0.1589	0.0276-0.9147	0.03942
cg12549906	0.298	0.094-0.9446	0.0397
cg20298978	1.04901e+06	1.9186-573554140224.361	0.03972
cg05116424	5.8496	1.0857-31.5152	0.03981
cg05786278	0.2397	0.0614-0.9358	0.03983
cg02137215	6.4234	1.0879-37.9265	0.04008
cg08873673	6.7748	1.0894-42.1312	0.04019
cg11604418	0.2343	0.0586-0.9373	0.04022
cg01833212	0.084	0.0079-0.8962	0.0403
cg26670789	0.2358	0.0592-0.9389	0.04042
cg11953015	0.2654	0.0746-0.9442	0.0405
cg03896436	4.0988	1.0625-15.8127	0.04057
cg15668074	0.1192	0.0156-0.913	0.0406
cg17548735	27.5295	1.1505-658.7575	0.04071
cg10399922	0.2542	0.0684-0.9442	0.04078
cg13749118	0.2991	0.0941-0.9513	0.04089
cg01670677	0.3822	0.1517-0.9631	0.04137
cg03225817	0.4249	0.1866-0.9672	0.04141
cg27132152	9.5306	1.0903-83.3066	0.04153
cg07090025	315.354	1.2446-79904.7747	0.04161
cg16173775	65.9723	1.1698-3720.4952	0.04173
cg04815242	0.2038	0.0441-0.9425	0.04177
cg17562874	25.4353	1.1276-573.7472	0.0418
cg27014913	0.2554	0.0686-0.9509	0.04184
cg04956471	4.7847	1.0552-21.6963	0.0424
cg08141659	9.8894	1.0811-90.4668	0.04246
cg20268857	0.3933	0.1597-0.9689	0.0425
cg21161526	5.6248	1.0594-29.8649	0.04259
cg00550797	7.3675	1.0688-50.7873	0.04261
cg04665046	10.0027	1.078-92.8148	0.04276
cg24335070	2.1887	1.0247-4.6748	0.04307
cg21813377	0.2788	0.0809-0.961	0.04308
cg09732851	0.1964	0.0405-0.9519	0.04326
cg10121219	12.5513	1.0761-146.3987	0.04354
cg02882755	0.2743	0.078-0.964	0.04368
cg05898092	6.6092	1.054-41.444	0.04379
cg10552106	9.2844	1.061-81.2471	0.04407
cg04023996	0.2478	0.0637-0.9643	0.04418
cg11216632	2.4765	1.0228-5.9965	0.04445
cg04766061	5.3715	1.0406-27.7272	0.0447
cg27223158	0.1825	0.0347-0.9608	0.04473
cg14423881	3.594	1.0301-12.5402	0.04481
cg05974816	0.0132	2e-04-0.9067	0.04493
cg23942599	17.204	1.0631-278.3992	0.04517
cg05852760	0.337	0.1162-0.9776	0.04533
cg07108351	3.4375	1.0251-11.527	0.04548
cg05740793	32.2627	1.0695-973.216	0.04565
cg03472610	0.2156	0.0479-0.9711	0.0457
cg06466348	2.6905	1.0191-7.1033	0.0457
cg14410738	31.331	1.0658-921.0516	0.04584
cg13430464	4.1661	1.0261-16.9152	0.04594
cg14434408	0	0-0.6134	0.0467
cg21379546	0.1758	0.0316-0.9764	0.0469
cg10242541	0.0923	0.0088-0.9684	0.04695
cg17513697	33.9067	1.0483-1096.6632	0.04697
cg06873590	0.2032	0.0422-0.9798	0.04711
cg24606701	3.2579	1.0144-10.4627	0.04725
cg09121543	3.0221	1.0127-9.0183	0.04741
cg02267488	5.1062	1.0186-25.5973	0.04744
cg12509524	0.0007	0-0.9261	0.04758
cg02278319	24.9666	1.0334-603.1715	0.04768
cg04394529	0.273	0.0755-0.9869	0.04769
cg05941025	4.8323	1.0151-23.0024	0.04783
cg13538648	0.3814	0.1466-0.9923	0.04818
cg03980550	2.8679	1.0068-8.1698	0.04854
cg20329084	0.1189	0.0143-0.991	0.04903
cg11758407	0.296	0.088-0.9955	0.04915
cg02343318	9.151	1.0058-83.2579	0.0494
cg16944405	34.8632	1.0089-1204.6751	0.04943
cg22688241	0.3336	0.1115-0.9976	0.0495
cg19508555	0.2551	0.0652-0.9977	0.04961
cg18130622	20.6011	1.0039-422.7762	0.04971
cg07185041	3.5222	1.0007-12.3972	0.04987
cg23234607	12.4429	0.9991-154.9723	0.05009
cg09400566	3.2038	0.9991-10.2737	0.05018
cg06401197	17.9767	0.995-324.8013	0.0504
cg20149431	10.6496	0.9943-114.0697	0.05056
cg02151485	0.0882	0.0077-1.0061	0.05057
cg25114611	5.2756	0.9947-27.9788	0.05073
cg03687765	9.4971	0.991-91.0187	0.05093
cg08368654	0.4345	0.1881-1.0035	0.05098
cg20203114	2.3726	0.9962-5.6505	0.051
cg05396243	0.276	0.0756-1.007	0.05124
cg24507955	5.5092	0.9904-30.6469	0.05131
cg10288578	0.3832	0.1457-1.0076	0.05182
cg13482172	0.3422	0.1161-1.0091	0.05196
cg00978203	26.2247	0.9713-708.0753	0.05206
cg01244346	13.6082	0.9768-189.5829	0.05208
cg14020129	0	0-1.1799	0.05229
cg07191545	0.2716	0.0727-1.0144	0.05254
cg23075970	0.1916	0.0361-1.0187	0.05259
cg20377114	0.2745	0.0742-1.016	0.05284
cg14106584	0.2301	0.052-1.0183	0.05287
cg15585794	0.3581	0.1266-1.0132	0.05295
cg05036615	4.5938	0.979-21.5566	0.05323
cg08744726	4.9286	0.9776-24.8484	0.0533
cg01641509	0.1354	0.0178-1.0311	0.05356
cg09168805	3.6013	0.9795-13.241	0.05376
cg13652536	0.2645	0.0685-1.0219	0.05379
cg07603449	5.5142	0.9725-31.2673	0.0538
cg12624829	0.0925	0.0082-1.0417	0.054
cg19861824	0.1694	0.0278-1.0318	0.05411
cg19401519	9.9555	0.96-103.2415	0.05413
cg15636879	3.5443	0.977-12.8581	0.05429
cg11855943	13.0912	0.9524-179.9383	0.05442
cg16918578	0.2807	0.0769-1.0244	0.05442
cg23406136	6.4469	0.9639-43.1205	0.05461
cg02904945	0.0618	0.0036-1.0594	0.05484
cg02069095	0.2421	0.0568-1.0324	0.05525
cg02825373	0.3526	0.1214-1.0241	0.05535
cg18633432	827.553	0.8532-802724.2328	0.05553
cg00447018	0.2909	0.0822-1.0299	0.05558
cg01279990	264.959	0.8749-80237.4628	0.0556
cg04839314	0.2132	0.0437-1.0388	0.05577
cg17834155	0.3466	0.1171-1.0265	0.05579
cg12448003	0.0475	0.0021-1.0791	0.05585
cg13434278	167.886	0.8791-32061.8527	0.05589
cg19471856	3.7525	0.9665-14.5693	0.05604
cg06723694	0.147	0.0206-1.0519	0.05618
cg26038318	0.0258	6e-04-1.1026	0.05627
cg14613508	2.9609	0.9713-9.0255	0.05629
cg24384519	0.3367	0.11-1.0308	0.05655
cg23490425	0.0611	0.0035-1.0823	0.05665
cg13664588	3.0133	0.9683-9.377	0.05686
cg06563066	7.1676	0.944-54.4238	0.05688
cg19262315	5.4545	0.9481-31.3789	0.05739
cg03286742	0.4053	0.1596-1.0292	0.05751
cg24826339	0.0709	0.0046-1.0923	0.05787
cg03653518	0.3714	0.1334-1.0345	0.05807
cg01596901	0.1428	0.019-1.0712	0.05835
cg02328403	141.407	0.8356-23930.5602	0.05858
cg03252527	57274.8	0.6574-4990003960.0842	0.05907
cg27018502	5.8859	0.9335-37.1101	0.05919
cg25471443	6.1863	0.931-41.1047	0.05929
cg16232530	1032.26	0.7554-1410529.925	0.05959
cg03584380	166.153	0.8122-33990.4625	0.05965
cg01373089	0.2534	0.0607-1.0579	0.05973
cg01437135	4.3829	0.9397-20.443	0.06001
cg06678662	62.7956	0.8377-4707.0962	0.06017
cg13209878	0.1121	0.0114-1.1034	0.06071
cg22200744	0.2065	0.0397-1.0745	0.06085
cg20052760	7.8719	0.9101-68.0887	0.06088
cg15072646	127.572	0.799-20369.4038	0.06103
cg02596994	4.6415	0.9311-23.1384	0.06109
cg26244575	7.2273	0.9121-57.2651	0.06109
cg05586304	0.3386	0.109-1.0521	0.06118
cg20200200	6.6242	0.9147-47.9706	0.06124
cg03170670	11.4088	0.8894-146.3519	0.0615
cg08082025	0.1294	0.0152-1.1043	0.06159
cg00830492	10.7575	0.8877-130.3573	0.06198
cg06686383	6.4735	0.9101-46.0451	0.06206
cg15958828	2.8562	0.9478-8.6068	0.06221
cg25499537	3.6772	0.9355-14.4542	0.06226
cg20458811	3.3465	0.9394-11.9218	0.06239
cg19764418	2.9364	0.943-9.144	0.06308
cg25431802	68.3732	0.7923-5900.2244	0.06322
cg15406387	3.3622	0.9339-12.1048	0.06355
cg12038583	0.2023	0.0374-1.0952	0.06368
cg03756485	3.5916	0.9298-13.8741	0.06369
cg20192387	0.1425	0.0182-1.1177	0.06374
cg04135246	0.2481	0.0568-1.0839	0.06391
cg07764676	8347.82	0.5921-117689439.9985	0.06396
cg01364581	0.3104	0.09-1.071	0.06411
cg26648306	14.8845	0.8526-259.859	0.06422
cg12678695	0.2885	0.0773-1.0769	0.06435
cg25249613	0.3071	0.0878-1.0737	0.06452
cg08076044	0.1146	0.0115-1.1417	0.06475
cg09336017	4.6055	0.9104-23.2972	0.06482
cg03885119	0.3094	0.0891-1.0751	0.06488
cg12461368	147.087	0.7322-29546.124	0.06507
cg12565335	0.391	0.1442-1.0606	0.06512
cg14448830	0.4039	0.1541-1.0587	0.06519
cg16357179	0.3125	0.0906-1.0778	0.06558
cg00491064	4.6571	0.9054-23.954	0.06561
cg01787382	7.095	0.878-57.331	0.06607
cg23168603	0.3907	0.1434-1.0644	0.06607
cg07442271	4.8164	0.8995-25.7909	0.06633
cg23434090	0.3166	0.0927-1.0809	0.06639
cg11089813	117.837	0.7233-19197.28	0.06646
cg11699125	4.9272	0.8962-27.0905	0.06667
cg24463290	5.1806	0.8927-30.0657	0.06674
cg10457361	0.2545	0.0589-1.1	0.0669
cg18685956	4936.01	0.5517-44162835.5751	0.06697
cg11803017	3.8315	0.9098-16.1358	0.06708
cg18144076	0.2389	0.0516-1.1069	0.06724
cg13257422	0.232	0.0485-1.1095	0.06727
cg03745383	0.2517	0.0574-1.1038	0.0674
cg15301316	0.3949	0.1459-1.0689	0.06743
cg24237862	5.2179	0.888-30.6608	0.06748
cg04044631	7.2987	0.8664-61.4882	0.06754
cg16562724	8.6753	0.8551-88.0124	0.06761
cg03627290	3.0636	0.9207-10.1943	0.06796
cg23674602	5.2992	0.8829-31.8048	0.06818
cg14990413	3.7139	0.9067-15.2127	0.06819
cg26529833	0.2262	0.0458-1.1175	0.06821
cg05844895	0.2447	0.0539-1.1113	0.06826
cg03066812	0.2162	0.0416-1.124	0.06862
cg22163674	10.2516	0.8357-125.7631	0.06882
cg26424888	6.7143	0.8628-52.25	0.06891
cg13016237	0.3405	0.1066-1.0878	0.06908
cg14409866	0	0-2.3507	0.06934
cg26052186	0.2454	0.0539-1.1178	0.06936
cg14144771	0.3209	0.0941-1.0943	0.06937
cg02187348	4.34335e+06	0.2926-64473262283057.4	0.06966
cg04565067	3.3644	0.9058-12.4966	0.06997
cg05262549	4.0227	0.8924-18.1332	0.07002
cg16019898	0.144	0.0177-1.1737	0.07025
cg15160274	0.3331	0.1013-1.0955	0.07033
cg08541155	5.7013	0.8654-37.5579	0.07034
cg16805065	253.818	0.6314-102031.4746	0.07035
cg26929925	3.7289	0.8961-15.5173	0.07043
cg15825692	2.6102	0.9228-7.383	0.07052
cg17135423	4.3174	0.8846-21.0713	0.07055
cg20770989	0.4104	0.1562-1.078	0.07067
cg16108090	0.2562	0.0585-1.122	0.07073
cg24756435	0.2296	0.0466-1.1324	0.07073
cg10031516	0.0439	0.0015-1.3034	0.07078
cg22859714	21.4634	0.7708-597.6234	0.07082
cg26058884	5.2743	0.8675-32.0659	0.07097
cg02894374	0.3241	0.0954-1.1012	0.071
cg15761405	0.4401	0.1805-1.0731	0.0711
cg12133048	5.0598	0.8696-29.4398	0.07115
cg10715637	14.1805	0.7947-253.0333	0.07128
cg09666532	7.6592	0.8373-70.058	0.07142
cg22959260	47.1752	0.7112-3129.2493	0.07175
cg27593593	6.9301	0.8424-57.0098	0.07178
cg01108026	0.1543	0.0202-1.1808	0.07188
cg04856629	18.2811	0.7708-433.5926	0.07205
cg20809470	0.2116	0.0388-1.1536	0.07268
cg23922724	3.2992	0.8936-12.1804	0.07326
cg26433368	0.1757	0.0262-1.1799	0.0735
cg22855255	0.3863	0.1363-1.0947	0.07351
cg00478601	16.0376	0.7659-335.8309	0.07376
cg23901967	4.4359	0.8642-22.7687	0.07424
cg06407111	3.4558	0.885-13.4939	0.07439
cg24995904	0.2902	0.0744-1.1317	0.07478
cg14916095	0	0-5.294	0.07509
cg12160317	0.3148	0.0881-1.1246	0.07521
cg19808829	830.597	0.5016-1375257.0203	0.07548
cg03031660	13.7227	0.7642-246.4349	0.0755
cg05538406	5.0114	0.8474-29.6364	0.07551
cg07086945	3.2505	0.8858-11.9275	0.07554
cg25791279	2.9194	0.8956-9.5161	0.07554
cg26552030	0.2712	0.0642-1.1454	0.07585
cg17186803	3.3327	0.8819-12.5943	0.07595
cg09817162	0.3923	0.1395-1.1035	0.07617
cg14656245	0.256	0.0565-1.16	0.07716
cg12460056	553.279	0.499-613461.1895	0.07746
cg22354905	7.7224	0.7979-74.7394	0.07756
cg00011740	0.3048	0.0815-1.1403	0.07757
cg07782630	128.764	0.582-28489.2926	0.07782
cg18786123	4.2428	0.8508-21.1573	0.07791
cg09765297	0.3236	0.0923-1.1348	0.07801
cg10081723	1434.8	0.442-4657323.4529	0.07806
cg14944575	5.5024	0.8249-36.7041	0.07822
cg06789677	0.2902	0.0732-1.1508	0.07839
cg03107888	2.8698	0.8871-9.2839	0.07842
cg03577858	0.1888	0.0295-1.2099	0.07859
cg06987132	0.3497	0.1084-1.1285	0.07879
cg14565265	2.4619	0.9015-6.7236	0.07882
cg09035284	0.4277	0.1658-1.1032	0.07895
cg02669770	0.1143	0.0102-1.2862	0.07906
cg04364194	13.0433	0.74-229.8919	0.07938
cg08124986	2.359	0.9027-6.1647	0.07993
cg26232187	0.1918	0.0302-1.2182	0.07999
cg19205041	2.7766	0.885-8.7113	0.08002
cg18713166	34.2903	0.6544-1796.795	0.08011
cg17161130	0.2408	0.0489-1.1863	0.08013
cg09108797	0	0-10.143	0.08024
cg21926276	0.222	0.041-1.202	0.08073
cg02341605	1484.13	0.4011-5491014.9878	0.0815
cg16056219	4.1581	0.8355-20.6947	0.08178
cg03225664	21.1734	0.6803-658.9792	0.0818
cg04817148	0.1865	0.028-1.2439	0.08282
cg20303441	2.1648	0.9043-5.1824	0.0829
cg03465028	1.8304	0.924-3.626	0.08306
cg02589604	0.2673	0.06-1.1896	0.08327
cg10861722	0.3744	0.1232-1.1382	0.08331
cg08749599	28.2374	0.6412-1243.4312	0.08365
cg02614661	0.0529	0.0019-1.4804	0.08377
cg07381930	7.1467	0.7678-66.5232	0.08402
cg24616828	17.0924	0.6826-427.9671	0.08406
cg03596280	0.1629	0.0208-1.2768	0.0841
cg14193097	2.6262	0.8775-7.8594	0.08428
cg14755258	0.3027	0.0777-1.1791	0.08497
cg14687660	2.763	0.8687-8.7878	0.08514
cg15143070	38.4768	0.6025-2457.3471	0.08524
cg13160386	3.9119	0.8274-18.4964	0.08528
cg11644370	2.6259	0.8739-7.8904	0.08547
cg02245566	0.4499	0.1808-1.1191	0.08581
cg14904363	3.347	0.8423-13.2997	0.08613
cg14433983	0.2563	0.0541-1.2137	0.08618
cg13757263	3.2043	0.8466-12.1276	0.08638
cg14452619	0.3769	0.1236-1.1498	0.08641
cg26251472	0.3633	0.1141-1.1566	0.08658
cg04399728	0.1613	0.02-1.3002	0.08664
cg12527478	2.7692	0.8635-8.8809	0.08671
cg26584747	0.4185	0.1544-1.1341	0.08678
cg27375286	4.8008	0.797-28.9167	0.08683
cg13362033	0.3109	0.0814-1.1872	0.08746
cg23925283	0.3102	0.0807-1.1914	0.08821
cg10230885	13.9079	0.671-288.2705	0.08876
cg22997909	10.8668	0.6947-169.9767	0.08906
cg09327778	0.2682	0.0588-1.2227	0.08908
cg22549339	0.3259	0.0895-1.1868	0.08908
cg25901400	20.1725	0.6312-644.6762	0.08919
cg07632771	2.7764	0.8547-9.0185	0.08936
cg24521811	3.7845	0.8149-17.576	0.08938
cg26865481	11.3625	0.6864-188.1006	0.08967
cg23716690	2.4022	0.873-6.61	0.08969
cg04529955	2761.82	0.2913-26185133.1632	0.08989
cg22473637	0.4187	0.1529-1.1463	0.09022
cg01807408	0.3287	0.0907-1.1916	0.09042
cg11478200	0.3485	0.1028-1.1815	0.09061
cg26415393	215.647	0.4272-108851.3481	0.09062
cg07909692	0.3071	0.0782-1.2058	0.09069
cg14455998	0.2828	0.0655-1.2218	0.09072
cg14689150	15.748	0.6435-385.4142	0.09108
cg05516271	9.4493	0.6959-128.3013	0.09149
cg20820438	21831.3	0.1983-2403035132.9653	0.09164
cg11761535	3.9692	0.7996-19.7046	0.09173
cg06251068	446.944	0.3712-538210.5809	0.09177
cg04927537	3.4427	0.818-14.4887	0.09179
cg17293868	2.7328	0.8489-8.7977	0.09193
cg18032812	0.3482	0.1018-1.1909	0.09266
cg05027713	0.3895	0.1297-1.1691	0.0927
cg14964658	370427	0.1189-1154490835145.16	0.09281
cg04343101	0.4094	0.1444-1.1608	0.09305
cg11607358	14.6885	0.6364-339.0135	0.09339
cg20009215	496.993	0.352-701704.9683	0.09339
cg14482569	2.4559	0.8597-7.0157	0.09341
cg22673269	0.3512	0.1034-1.1931	0.09353
cg19910128	11.658	0.6576-206.6855	0.09409
cg24876897	3.7388	0.7984-17.5091	0.09412
cg23467659	0.4339	0.1631-1.1541	0.09436
cg14382215	4.4612	0.7734-25.7335	0.09442
cg13213987	8.2534	0.6954-97.9628	0.0945
cg06662132	6.554	0.7228-59.4251	0.09464
cg04472592	4.5306	0.7699-26.6633	0.09477
cg08364677	1220.71	0.2918-5107014.3328	0.09483
cg15798873	237.087	0.3868-145327.7645	0.09494
cg13477354	6.1051	0.7303-51.0404	0.09496
cg06193628	5.2358	0.7487-36.6146	0.09525
cg09377064	0.1675	0.0205-1.3684	0.09546
cg03185144	17.0738	0.6057-481.2567	0.09578
cg23291145	6.7484	0.7081-64.3124	0.09693
cg14638209	39.8593	0.5127-3098.6545	0.09707
cg16361253	3.9485	0.7788-20.018	0.09729
cg02884928	3.048	0.8159-11.3865	0.09744
cg02432467	8.8658	0.6695-117.4092	0.09781
cg13950362	0.2689	0.0567-1.2751	0.09814
cg01888206	19780.3	0.16-2444705721.6058	0.0982
cg07364638	8436.43	0.1873-379978829.5269	0.09821
cg01476003	0.2322	0.0409-1.3166	0.09908
cg25306087	0.4221	0.1514-1.1766	0.09914
cg14018414	0.3209	0.0831-1.2394	0.09923
cg17494863	8.1365	0.6717-98.5586	0.0995
cg16537367	8.307	0.6682-103.2796	0.09968
cg06231863	9.7298	0.6479-146.1084	0.09976
cg11891983	175.04	0.3734-82057.8355	0.09976
cg10930289	0.3557	0.1037-1.2204	0.10031
cg13595415	3.7662	0.7743-18.318	0.10036
cg04886217	0.2877	0.0651-1.2725	0.10053
cg22609722	71.2692	0.438-11597.0762	0.10055
cg25772438	7.2688	0.6808-77.6126	0.10065
cg01225698	0.2426	0.0447-1.316	0.10067
cg06394058	0.2211	0.0364-1.3408	0.10078
cg24063039	204.624	0.3549-117965.0938	0.10088
cg24654028	3.8739	0.7665-19.5777	0.10136
cg10218546	0.2538	0.0491-1.3125	0.10191
cg23792308	2.0307	0.8689-4.7457	0.10194
cg00500507	3.9267	0.7623-20.2281	0.10197
cg06489077	2.9446	0.807-10.7438	0.10198
cg18720698	0.2811	0.0613-1.2893	0.10247
cg13577072	7.4969	0.6667-84.2999	0.10276
cg17998826	11.89	0.6069-232.9469	0.1029
cg00135293	2.5748	0.8259-8.0271	0.10306
cg01771201	20.3914	0.5414-768.0316	0.10341
cg12093371	0.4508	0.1727-1.1767	0.10362
cg14422899	0.1394	0.013-1.4981	0.10388
cg09323975	0.2283	0.0385-1.3549	0.10401
cg07223240	3.8561	0.7567-19.6495	0.10428
cg01558909	0.4747	0.1931-1.1668	0.10442
cg08391894	11.1495	0.607-204.7901	0.10442
cg10743104	0.2242	0.0368-1.3638	0.10456
cg21839588	0.2874	0.0636-1.2982	0.10506
cg18199807	0.0476	0.0012-1.8938	0.10519
cg24202522	0.0036	0-3.2683	0.10535
cg25652751	3.6632	0.7605-17.6443	0.10552
cg10818986	0.381	0.1184-1.2259	0.10558
cg26882410	3.7017	0.7578-18.081	0.10581
cg27518375	0.1597	0.0173-1.4757	0.10589
cg07440637	0	0-91.6414	0.10677
cg20802392	4.6293	0.7188-29.816	0.10685
cg11628739	3.4117	0.7675-15.1643	0.10688
cg20160039	0.2811	0.0601-1.3154	0.10701
cg12941836	5.5866	0.6893-45.2771	0.10708
cg20110742	0.4002	0.1313-1.2196	0.10723
cg24526596	0.1813	0.0226-1.4552	0.10808
cg08814268	47948.6	0.0933-24643390901.2733	0.10818
cg20812354	0.3396	0.0909-1.2686	0.10824
cg01203113	9.5797	0.6075-151.0657	0.10832
cg25142954	27.6054	0.4807-1585.3537	0.10838
cg11554610	9.7217	0.6039-156.5104	0.10867
cg05005358	0.3812	0.1173-1.2394	0.10891
cg08475996	0.2675	0.0533-1.3419	0.10903
cg10010997	0	0-40.4978	0.10945
cg25170091	4.6739	0.7063-30.9278	0.10974
cg12735333	3.5878	0.7484-17.2003	0.11016
cg14484844	2.9731	0.7804-11.3277	0.11036
cg08050235	0.3029	0.0698-1.3155	0.11094
cg25353281	2.0977	0.8432-5.2183	0.11111
cg18176712	4.1568	0.7202-23.9907	0.11116
cg07832203	14.4593	0.5389-387.9676	0.11147
cg19089649	0.2687	0.0532-1.3562	0.11159
cg16394952	0.2831	0.0598-1.3412	0.11181
cg09478478	0.4623	0.1784-1.1983	0.11235
cg10235181	0.2971	0.0663-1.3309	0.11266
cg19871361	39.6831	0.4195-3753.8127	0.1128
cg12797492	0.2794	0.0577-1.3532	0.11314
cg10549974	0.1564	0.0157-1.5534	0.11319
cg19425332	0.2475	0.044-1.393	0.11319
cg27078652	0	0-10.9878	0.11339
cg18569335	0.0098	0-3.0124	0.11354
cg25813235	31.1521	0.4397-2206.9035	0.11365
cg03466326	4.3185	0.7005-26.624	0.11494
cg08694280	3.8382	0.7207-20.4415	0.115
cg12114260	0.1852	0.0227-1.5103	0.11528
cg25537846	1648.99	0.1628-16699455.4529	0.11543
cg03533058	4.8394	0.6788-34.4995	0.11562
cg13260012	0.3471	0.0928-1.298	0.11585
cg08031413	2.9763	0.764-11.5945	0.11596
cg06684850	0.3528	0.0961-1.2945	0.11622
cg01329434	3.9517	0.7104-21.9802	0.11653
cg00080188	3.6532	0.7195-18.5491	0.11808
cg09194778	0.1778	0.0204-1.5518	0.11818
cg03404726	10.235	0.5495-190.6212	0.11906
cg14225021	18.3165	0.4721-710.6657	0.11927
cg15861357	0.1541	0.0146-1.6238	0.1196
cg24913825	2.9445	0.7556-11.475	0.11969
cg22912610	2.6094	0.7776-8.7567	0.1205
cg02519681	5.8703	0.6269-54.9688	0.12095
cg18145196	2.4395	0.7894-7.539	0.12136
cg13545897	0.1702	0.018-1.6063	0.12206
cg15768568	51.4429	0.3482-7600.7329	0.1221
cg04436714	2.952	0.7483-11.646	0.12214
cg27234090	4.0724	0.6865-24.1578	0.12214
cg01119072	5.5255	0.6323-48.2849	0.12222
cg00019118	0.3315	0.0811-1.3553	0.12434
cg09807215	0.4263	0.1436-1.2655	0.12458
cg24756391	4098.35	0.0991-169438921.9217	0.12508
cg00492521	0.2741	0.0524-1.4336	0.12521
cg07011711	4.1416	0.6724-25.5081	0.12549
cg10183150	10.8253	0.514-228.0093	0.12555
cg11410649	3.088	0.7251-13.1504	0.1272
cg14517743	2.0599	0.8132-5.2183	0.12754
cg19046695	3.665	0.6888-19.4997	0.12779
cg26745551	20.7506	0.4184-1029.0316	0.12787
cg08788681	11.4133	0.4967-262.283	0.12792
cg04149603	0.3211	0.0743-1.3871	0.1281
cg10128166	54.8818	0.315-9562.2715	0.12821
cg15974487	10.6297	0.5036-224.3654	0.12874
cg02659086	0	0-21.9428	0.12883
cg09262171	1.8838	0.8319-4.2659	0.12886
cg00469269	16.077	0.4454-580.2451	0.12902
cg16743754	0.2121	0.0286-1.571	0.12905
cg25168288	0	0-440.5596	0.12984
cg22273804	0.4666	0.1739-1.2514	0.12992
cg01928411	0.4382	0.1491-1.2877	0.13356
cg00992711	0.1493	0.0124-1.795	0.13389
cg24889693	3.5632	0.6758-18.7881	0.13414
cg19712198	0.5249	0.2258-1.2204	0.13432
cg01120509	3.4747	0.6798-17.7594	0.13456
cg16230878	337.435	0.1645-691982.6097	0.13461
cg02304033	0.3723	0.102-1.3585	0.13464
cg14795690	0.2903	0.0574-1.4676	0.13467
cg12083852	6.8644	0.5496-85.7379	0.13484
cg02184643	11.171	0.4714-264.7458	0.13511
cg06759189	0.5002	0.2015-1.2416	0.13532
cg24798914	0.2529	0.0416-1.5364	0.13532
cg01557667	12437.8	0.0522-2964402822.8039	0.13556
cg03495497	0.3019	0.0626-1.456	0.1357
cg23984397	0.5389	0.2391-1.2149	0.13606
cg14093065	0.3489	0.0873-1.3951	0.13648
cg26188814	0	0-37.8469	0.13692
cg13602343	4.4358	0.6221-31.6267	0.13717
cg24842998	3.0414	0.7015-13.186	0.13722
cg03114253	0.4947	0.1956-1.2515	0.13724
cg14191493	0.3447	0.084-1.4154	0.13944
cg02744588	4.7117	0.603-36.8184	0.13949
cg14943796	2.8269	0.7122-11.2203	0.13954
cg03819320	47.8922	0.2806-8174.803	0.14012
cg15969901	3.9503	0.635-24.5741	0.14074
cg27024417	68.0276	0.2469-18740.6099	0.141
cg18520925	3.2341	0.677-15.4505	0.14128
cg01123926	8.9973	0.4722-171.4188	0.14401
cg22920289	341.038	0.1364-852869.5407	0.14405
cg25840536	2.8063	0.7024-11.2118	0.14424
cg19547694	8.9343	0.4724-168.9555	0.14428
cg08201152	2468.53	0.0682-89414631.6048	0.14472
cg27467552	12.8841	0.4149-400.0611	0.1448
cg12311510	39.4263	0.2819-5514.7019	0.14494
cg15903819	7.6085	0.4957-116.7706	0.14529
cg22515937	0.5041	0.2005-1.2674	0.14533
cg15259031	0.4082	0.1222-1.3635	0.14537
cg12140543	0.3221	0.0701-1.4805	0.14545
cg19176285	2.1992	0.7609-6.3569	0.14559
cg17782974	1.882	0.803-4.4112	0.14566
cg25911551	2.1781	0.7627-6.2206	0.14595
cg09906647	6.0853	0.5242-70.6426	0.14884
cg03882167	0.4253	0.1332-1.3579	0.14889
cg04010712	3125.23	0.0561-174116485.6981	0.14894
cg00255811	20.3202	0.3394-1216.5871	0.14918
cg27223272	0.482	0.1787-1.3002	0.14948
cg07487731	2.447	0.7244-8.266	0.14965
cg03758732	0.3497	0.0837-1.4621	0.15002
cg18194535	3.1994	0.6556-15.6125	0.15043
cg03947735	0.1641	0.014-1.928	0.15051
cg18464001	975.91	0.0811-11744415.2184	0.15103
cg03515656	3.3169	0.6452-17.051	0.15117
cg26511507	5.1593	0.5442-48.9174	0.15279
cg02100497	5.1797	0.5422-49.4777	0.15317
cg00479240	0.3387	0.0766-1.4977	0.15347
cg09159795	3.5163	0.625-19.7823	0.15366
cg13867915	1.9938	0.7721-5.1488	0.15399
cg14355794	0.2877	0.0518-1.5989	0.15455
cg03772567	2.065	0.7609-5.6039	0.15457
cg11999044	0.3964	0.1108-1.4177	0.1547
cg03800178	0.4021	0.1137-1.4226	0.1576
cg11241278	4.1125	0.5782-29.2502	0.15776
cg10506461	0.2815	0.0485-1.6355	0.15796
cg20057831	183.878	0.1313-257484.3346	0.15833
cg03053290	4.3187	0.5653-32.9957	0.1585
cg18261461	2.80353e+06	0.003-2603294608901470	0.15878
cg13434308	0.4441	0.1436-1.3739	0.15894
cg17896965	0.4223	0.1271-1.4026	0.15926
cg11883737	23.9227	0.2876-1989.9107	0.15928
cg04007792	0.1948	0.02-1.9011	0.15933
cg04865220	4.6078	0.5486-38.7055	0.15944
cg10832998	4.4972	0.5537-36.5261	0.15948
cg04034846	0.3852	0.1019-1.4554	0.15953
cg11094012	0	0-188.1432	0.15961
cg23974202	1763.37	0.0526-59120003.8924	0.15972
cg23584554	0.3222	0.0659-1.5761	0.16204
cg01785706	3.4143	0.6103-19.101	0.16216
cg18355311	3.7478	0.5877-23.9002	0.16222
cg06760830	2.037	0.7508-5.5265	0.16235
cg00724111	2.8775	0.6532-12.6761	0.1624
cg17217443	10.1312	0.3917-262.0378	0.16294
cg18316386	3.9347	0.5731-27.015	0.16344
cg19326244	2.003	0.7539-5.3215	0.1635
cg09527192	0.0059	0-8.121	0.16388
cg27446137	3.1108	0.6288-15.3909	0.16417
cg26860613	3.8611	0.574-25.9733	0.1648
cg06393879	0.3268	0.0675-1.5835	0.16482
cg16266358	8.2268	0.4141-163.4471	0.16702
cg06790581	0.1151	0.0054-2.4712	0.16705
cg23814172	3.5597	0.5869-21.5912	0.16744
cg05892419	2.8489	0.6438-12.6074	0.16772
cg22427313	2.6595	0.6623-10.6796	0.16788
cg14191109	14.6132	0.3223-662.6325	0.16817
cg15046388	0.3786	0.0951-1.5084	0.16848
cg06699555	2.27	0.7058-7.3013	0.16902
cg23141333	13268.5	0.0177-9960125386.0205	0.16903
cg05922563	0.2859	0.0479-1.7081	0.16977
cg25331127	0.3804	0.0954-1.5172	0.17088
cg04491365	10.0441	0.3697-272.8846	0.1709
cg19800155	0.4567	0.1487-1.4027	0.17104
cg13597013	6.1054	0.4578-81.4204	0.17105
cg16029368	22581.7	0.0131-38974094812.3372	0.17126
cg15756319	4.4546	0.5233-37.9238	0.17156
cg19762564	0.1303	0.007-2.4244	0.17186
cg16441550	0.147	0.0093-2.3207	0.17321
cg16580683	0.36	0.0828-1.5662	0.17323
cg04268405	8.2268	0.3954-171.1887	0.17359
cg04186580	15.0991	0.2993-761.7653	0.1748
cg14178348	4.0861	0.5348-31.2211	0.17488
cg21155767	0.2661	0.0393-1.8017	0.1749
cg15553342	0.4042	0.1091-1.4971	0.1751
cg13643814	2.206	0.6993-6.9593	0.1771
cg10516832	2.4525	0.666-9.0313	0.17739
cg09234698	0.4424	0.1352-1.4475	0.1775
cg13506547	0.2825	0.0449-1.7795	0.17825
cg11541433	0.4897	0.1728-1.3871	0.17895
cg02385230	2.9762	0.6049-14.6449	0.17974
cg04086468	3.7676	0.539-26.3364	0.18123
cg22627427	2.5868	0.6419-10.4254	0.18139
cg02526981	0.4534	0.142-1.4481	0.18185
cg18673954	0.574	0.254-1.2972	0.18207
cg05764238	2.4438	0.6572-9.0882	0.18238
cg04614923	3.7938	0.5327-27.0177	0.18312
cg04622777	0.2859	0.0452-1.809	0.18344
cg23392097	0.382	0.092-1.5862	0.18522
cg20751706	2.8918	0.6007-13.9201	0.18537
cg27039662	0.5835	0.2629-1.2953	0.18553
cg04722756	408.526	0.0552-3022099.2624	0.18591
cg27333283	5.0507	0.4578-55.7207	0.18613
cg01466330	7.1358	0.3865-131.7594	0.18653
cg13579960	43644.4	0.0056-338951100750.299	0.18688
cg19480470	0.4155	0.1123-1.5378	0.18837
cg08885381	5.29	0.442-63.314	0.18841
cg04396936	3.0254	0.5806-15.766	0.18872
cg19071490	0.3811	0.0904-1.6061	0.18872
cg10603824	401.985	0.0525-3076769.2524	0.18878
cg19699056	2.4771	0.64-9.5872	0.18896
cg27256629	0.4665	0.1493-1.4575	0.18955
cg14131273	0.3902	0.0954-1.595	0.19017
cg09519060	0.3188	0.0575-1.7678	0.19087
cg05332077	0.0055	0-13.417	0.19095
cg26894854	3.2324	0.5559-18.7946	0.19147
cg23384737	0.5642	0.2387-1.3336	0.19222
cg01954305	2.1899	0.6738-7.1168	0.19241
cg26692873	4.1473	0.487-35.3183	0.19306
cg26128123	0.2965	0.0475-1.8506	0.1932
cg02890434	16.6769	0.2398-1159.6912	0.19353
cg13593323	4.1504	0.4856-35.4714	0.19356
cg21340316	17.239	0.2357-1260.7817	0.19357
cg04141008	2.8477	0.5873-13.8081	0.19386
cg23118721	2.5349	0.6217-10.335	0.19457
cg11854183	2.2538	0.6593-7.7044	0.19508
cg20710635	15.5586	0.2386-1014.4512	0.19785
cg18863090	0.3704	0.0816-1.6809	0.1981
cg22215258	108.875	0.0858-138130.7567	0.19829
cg08688393	3.056	0.5566-16.7784	0.19856
cg03751030	0.3553	0.0733-1.7217	0.19873
cg21413492	3.4148	0.5234-22.2792	0.19934
cg09524658	2.1637	0.665-7.0404	0.19977
cg08020574	1890.29	0.0182-196545959.1618	0.20053
cg18157027	0.0508	5e-04-4.878	0.20075
cg15073853	2.2796	0.6448-8.0592	0.20092
cg20164479	0.4527	0.1343-1.5252	0.20094
cg15225844	0.4633	0.1421-1.5101	0.20186
cg13274644	2684.28	0.0145-497805795.2296	0.20208
cg05244952	0.4562	0.1365-1.5252	0.20249
cg05265071	2.2468	0.6459-7.8153	0.20308
cg09779635	17.9721	0.2078-1554.1481	0.20425
cg17073306	2.4155	0.6187-9.4309	0.20445
cg04819760	1.9871	0.6879-5.7399	0.20452
cg05962487	0.4551	0.1349-1.536	0.20464
cg04254609	4.3747	0.4472-42.7921	0.20465
cg06073348	0.2588	0.032-2.0915	0.20484
cg23797073	9.8662	0.2866-339.6793	0.20487
cg09103658	0.4937	0.1657-1.4708	0.20507
cg05960850	0.4067	0.1011-1.6358	0.20517
cg21218820	0.3088	0.0501-1.902	0.20524
cg12248672	0.4296	0.1157-1.5953	0.20687
cg10099209	1.9967	0.6793-5.8688	0.20875
cg21330577	3.2872	0.5117-21.1158	0.20984
cg11626052	0.4484	0.1278-1.5727	0.21028
cg13758666	0.0043	0-21.6993	0.21038
cg25089357	0.3221	0.0546-1.8997	0.21084
cg21022002	3.0688	0.5294-17.7901	0.2111
cg26458617	0.428	0.113-1.6208	0.21162
cg01715538	2.926	0.5405-15.8397	0.21277
cg27254338	2.6627	0.5698-12.4415	0.21313
cg03251111	0.52	0.1856-1.4568	0.21345
cg14701962	3.1081	0.5207-18.554	0.21349
cg25423402	16.7073	0.1969-1417.6858	0.21396
cg15664943	0.5128	0.1787-1.4713	0.21425
cg22184145	34.4877	0.123-9669.9437	0.21823
cg05115161	78.677	0.0754-82052.1484	0.21828
cg15513620	2.2254	0.6226-7.9547	0.2184
cg00618323	3.1915	0.5022-20.2808	0.21869
cg02477548	245.9	0.0378-1598668.7038	0.21911
cg02931247	0.3759	0.0788-1.7942	0.21986
cg04800585	1.7198	0.7232-4.0896	0.21992
cg16226369	52.3667	0.0938-29239.9616	0.21999
cg20770409	2.3643	0.5965-9.3705	0.2207
cg24783499	1.9263	0.6746-5.5008	0.22073
cg12019475	4.9138	0.384-62.8765	0.22092
cg17478282	3.0538	0.5092-18.3131	0.22187
cg14985481	2.3193	0.598-8.9959	0.22382
cg11158629	0.2165	0.0184-2.5505	0.22399
cg18204334	0.452	0.1256-1.627	0.22434
cg05068461	0.1113	0.0032-3.8506	0.22466
cg09796913	0.2213	0.0194-2.5273	0.22481
cg24753061	2.1253	0.6282-7.1903	0.22537
cg01431559	15.3952	0.184-1288.4338	0.22612
cg03111114	2.5502	0.56-11.6135	0.22615
cg23652172	2.1685	0.619-7.597	0.22627
cg12848631	0.139	0.0057-3.4155	0.22702
cg23633626	876.76	0.0146-52762679.7688	0.2275
cg08295543	0.1652	0.0088-3.1155	0.22954
cg06644051	4.0789	0.4116-40.4214	0.22961
cg27213549	2.9493	0.5032-17.2867	0.23061
cg05655806	1.8157	0.6845-4.8163	0.23079
cg21545535	2.6591	0.5362-13.1871	0.23129
cg21040360	0.0705	9e-04-5.438	0.23161
cg07953015	1.7642	0.6949-4.4786	0.23237
cg09041756	65.4289	0.0682-62739.2262	0.23266
cg07737564	62.3815	0.0692-56254.5629	0.23382
cg16941568	3.9535	0.4102-38.0991	0.23437
cg07737802	2.0628	0.6252-6.8063	0.23454
cg09854011	1.948	0.6487-5.8495	0.23459
cg14284889	1.52604e+06	1e-04-25181479198145344	0.23556
cg18606683	1485.59	0.0082-270697815.5041	0.2373
cg07630723	2.2917	0.5785-9.0785	0.23771
cg03595083	0.3048	0.0424-2.193	0.23801
cg08170679	5.7626	0.3141-105.7161	0.23805
cg05309760	0.1732	0.0094-3.1899	0.23816
cg09633533	2.9265	0.4909-17.4471	0.23846
cg21241477	4.5787	0.3647-57.481	0.23855
cg09071834	0.5192	0.1745-1.5446	0.23867
cg17811857	0.3652	0.0684-1.951	0.23871
cg07670676	5.6427	0.3128-101.7792	0.24099
cg23624133	0.5451	0.1975-1.5047	0.24151
cg07775292	1.9654	0.6344-6.0892	0.24155
cg16962115	2.0302	0.6184-6.6651	0.24301
cg17836940	4.07459e+07	0-2.4640378492965e+20	0.24323
cg24737201	3.6672	0.4126-32.5943	0.24371
cg14286550	65.4448	0.0574-74577.2321	0.24429
cg09889479	0.4615	0.1252-1.7007	0.24523
cg25830696	0.6597	0.3268-1.3319	0.2459
cg03394909	3.9182	0.3879-39.5766	0.24712
cg00344644	8.6173	0.2222-334.1663	0.24849
cg03685562	4.3877	0.3559-54.0906	0.24854
cg08716372	0.2273	0.0183-2.8164	0.24865
cg20845466	14.2373	0.1561-1298.6753	0.24876
cg03075156	4.4117	0.3541-54.9698	0.24881
cg09686333	0.5422	0.1914-1.5359	0.24921
cg02978204	0.2538	0.0246-2.6185	0.24952
cg02350974	0.3256	0.0482-2.1996	0.24962
cg26913798	29083.6	7e-04-1175854727616.99	0.2501
cg12440751	0.3966	0.0818-1.9221	0.25076
cg10673984	573538	1e-04-4515255739053216	0.25408
cg04919592	3.7693	0.3851-36.8953	0.25426
cg12120238	391906	1e-04-1641424961378752	0.25458
cg18302637	0.2892	0.0342-2.4442	0.2546
cg12751432	0.477	0.1334-1.7055	0.2548
cg27413008	1.7893	0.657-4.8727	0.25503
cg06821871	0.4624	0.1224-1.7474	0.2555
cg21533216	2.6059	0.499-13.6079	0.25608
cg24913110	0.3339	0.0503-2.219	0.25634
cg00852924	2.3158	0.5418-9.8986	0.25718
cg06872172	1.9356	0.6166-6.0758	0.2578
cg07996580	0.4	0.0816-1.9618	0.25873
cg22095263	2.6428	0.4869-14.3463	0.26016
cg00801003	0.4001	0.0812-1.9714	0.26024
cg19795796	2.5056	0.5057-12.4139	0.26061
cg12927277	1.997	0.5982-6.6665	0.26077
cg00350448	1.922	0.6147-6.009	0.26129
cg03598313	0.5998	0.2457-1.4645	0.26174
cg19268477	0.4153	0.0893-1.9316	0.2625
cg19410471	0.516	0.1622-1.6418	0.26254
cg22596932	0.5615	0.2043-1.5433	0.26324
cg26171271	3.6068	0.3806-34.1826	0.26356
cg15284794	11.2936	0.1602-796.3703	0.26423
cg16579144	0.3388	0.0506-2.268	0.26452
cg21763482	0.596	0.2397-1.4817	0.26538
cg12567615	0.4562	0.1145-1.8177	0.26586
cg16378133	1.7493	0.6531-4.6852	0.2659
cg01313518	3.7694	0.3608-39.377	0.26768
cg22697786	0.4586	0.1155-1.8212	0.26787
cg24000860	0.0836	0.001-6.7673	0.26831
cg06994016	2.6224	0.475-14.4795	0.26877
cg05982345	3.3048	0.3971-27.5002	0.26883
cg07032446	0.4389	0.1018-1.8915	0.26923
cg06002616	0.1159	0.0025-5.3109	0.26946
cg18805978	0.4699	0.123-1.7958	0.26958
cg00984694	2.0415	0.5732-7.2712	0.27082
cg02471310	2.5642	0.4777-13.765	0.27208
cg17441982	0.3034	0.036-2.556	0.2727
cg11939346	0.503	0.1468-1.7239	0.27421
cg01864836	2.2483	0.526-9.609	0.27432
cg08066035	1.831	0.6148-5.4529	0.27731
cg04769705	6.2356	0.2292-169.6168	0.27749
cg20152309	1.5873	0.6891-3.6564	0.27778
cg05482119	2.9667	0.4154-21.1867	0.27829
cg19901096	3875.54	0.0013-11988965593.2309	0.27855
cg07184316	0.6302	0.2732-1.4535	0.27885
cg26719629	0.4968	0.14-1.7635	0.27912
cg17341765	2.3103	0.5064-10.5404	0.27956
cg10151454	0.3858	0.0686-2.1692	0.27969
cg03955334	0.612	0.2512-1.4912	0.27986
cg14031365	1.7022	0.6484-4.4689	0.28009
cg07548313	0.6095	0.2479-1.4986	0.28075
cg20015338	0.3762	0.0636-2.2241	0.28091
cg02890126	99.3137	0.0225-438262.4552	0.28287
cg26383838	2.1676	0.5279-8.9007	0.28308
cg15990211	3.2161	0.3801-27.2089	0.28363
cg06812760	0.4518	0.1055-1.9346	0.28428
cg26464934	3.2564	0.3751-28.2722	0.28432
cg12118972	0.2801	0.0272-2.8809	0.28453
cg18836689	2.4404	0.4761-12.509	0.28462
cg02152271	0.4195	0.0853-2.0637	0.28519
cg00757212	0.0575	3e-04-10.8514	0.28542
cg14349531	0.499	0.1393-1.787	0.28551
cg08451870	2.7366	0.4307-17.3889	0.28595
cg12867610	0.4448	0.1004-1.9705	0.28607
cg03936495	1.7273	0.6328-4.7152	0.28608
cg06770993	4.0129	0.312-51.6072	0.2863
cg19726355	0.5206	0.1567-1.7294	0.28656
cg24073042	0.5262	0.161-1.7191	0.28778
cg01930746	1.8032	0.6072-5.355	0.28839
cg09545880	0.4803	0.1238-1.8638	0.28917
cg19106237	0.4909	0.1315-1.8319	0.28958
cg13694662	0.3224	0.0396-2.6225	0.28985
cg09299086	2.2192	0.5069-9.7168	0.29004
cg25382573	1.997	0.554-7.1985	0.29039
cg12588208	8.9803	0.1532-526.3721	0.29061
cg08121755	0.0681	5e-04-9.9967	0.2912
cg08060195	0.4062	0.0762-2.1648	0.29129
cg21733794	2.3625	0.4776-11.6873	0.29191
cg11141340	2.2245	0.5029-9.8406	0.29194
cg04100227	7.493	0.1769-317.4258	0.29204
cg25294785	0.0004	0-867.7488	0.29225
cg24365867	2.7322	0.4202-17.7637	0.29267
cg11099236	0.4937	0.1325-1.8392	0.29284
cg22886237	5.0305	0.2442-103.6361	0.29528
cg14984943	0.6336	0.2694-1.4899	0.29553
cg05017276	5.6183	0.2211-142.7364	0.29568
cg00118712	0.1423	0.0037-5.516	0.29611
cg25365783	6.6216	0.1908-229.7417	0.29618
cg11296230	0.1095	0.0017-7.0775	0.29838
cg20556786	0.3846	0.0635-2.3293	0.29841
cg10784110	3.6916	0.3142-43.3708	0.29881
cg18158172	0.3892	0.0653-2.3192	0.3001
cg23140396	2.5312	0.4363-14.6862	0.30054
cg04053571	0.4604	0.1059-2.0009	0.30078
cg24247565	0.4534	0.1009-2.0371	0.30218
cg10110652	0.4153	0.0779-2.2148	0.30349
cg27643890	3.2296	0.3457-30.1699	0.3038
cg09107240	2.6522	0.4128-17.0416	0.30411
cg13688770	1.8865	0.5622-6.3302	0.30414
cg16262392	2.38	0.4502-12.5817	0.30742
cg03399905	0.503	0.1343-1.8846	0.30792
cg06874920	410.471	0.0038-44007754.1164	0.30857
cg01421830	0.3412	0.043-2.7065	0.30883
cg05426961	0.4076	0.0723-2.2964	0.30893
cg22706505	2.0687	0.5091-8.4066	0.30956
cg00210210	3.1145	0.3473-27.933	0.31011
cg00970926	0.2277	0.0131-3.9682	0.31021
cg09366312	0.5355	0.16-1.7924	0.31097
cg07201003	0.5664	0.1884-1.7027	0.31138
cg08624680	1.6381	0.6285-4.2692	0.31258
cg04291383	0.5433	0.1662-1.7762	0.31278
cg11787218	0.455	0.0984-2.104	0.3135
cg23234261	2.5565	0.4116-15.8786	0.31379
cg18551877	0.5577	0.1787-1.7406	0.31459
cg25598672	3.3456	0.3177-35.2325	0.31472
cg09704054	1.699	0.6042-4.7773	0.31498
cg07924892	0.1032	0.0012-8.6628	0.31505
cg06677890	1.6996	0.6036-4.7857	0.31533
cg04385058	10.7674	0.1036-1119.3636	0.31586
cg22496437	2.1566	0.4731-9.8305	0.32074
cg07568644	0.4146	0.0729-2.3574	0.32075
cg01418667	4.7819	0.2177-105.0542	0.32086
cg06344270	68.1481	0.0162-286841.9513	0.32143
cg06058073	0.5714	0.1888-1.7297	0.32202
cg16752940	0.4833	0.1145-2.0405	0.32243
cg00473702	0.5502	0.1684-1.7977	0.32266
cg13363025	2.7988	0.3629-21.5858	0.32343
cg25209111	2.8114	0.3611-21.8908	0.32357
cg26464586	2.2458	0.4503-11.1993	0.32371
cg10115387	0.4957	0.123-1.9979	0.32376
cg15355341	5.2025	0.1953-138.6176	0.32479
cg05245416	0.5928	0.2093-1.6787	0.32483
cg24568150	2.0925	0.4793-9.1344	0.3261
cg09253150	0.0833	6e-04-11.9313	0.32645
cg21840888	14.5283	0.0693-3046.1658	0.32649
cg10523193	0.3045	0.0283-3.2813	0.32695
cg09393834	0.1763	0.0055-5.6676	0.327
cg22498676	1.9517	0.5065-7.5209	0.33125
cg07927984	2.078	0.4748-9.0941	0.33153
cg04939326	2.0966	0.4686-9.3807	0.33284
cg03575041	0.4727	0.1037-2.1547	0.33299
cg14178380	2.1232	0.4621-9.7558	0.33321
cg24928378	3.0257	0.3213-28.4959	0.33323
cg25824509	2.4673	0.3955-15.3921	0.33359
cg19346202	0.3891	0.0574-2.6367	0.33361
cg20789464	19.0915	0.0483-7539.7726	0.33363
cg18005867	1.717	0.5735-5.1402	0.33394
cg00695982	1.8009	0.5456-5.9446	0.33427
cg13422136	0.5332	0.1487-1.9123	0.33453
cg19876216	0.5257	0.1424-1.9415	0.33474
cg16619995	0.3806	0.0532-2.7203	0.3357
cg11339912	4.4012	0.2093-92.5377	0.34028
cg16145324	2.0765	0.4615-9.3426	0.34095
cg13454846	2.8389	0.3315-24.3133	0.34096
cg13416109	0.5053	0.124-2.0594	0.34101
cg15008984	0.6214	0.2332-1.6553	0.34118
cg26025224	2.079	0.4605-9.3859	0.34126
cg00319661	0.6732	0.2977-1.5224	0.34183
cg07709692	0.5558	0.1656-1.8661	0.34193
cg18431640	0.5715	0.1801-1.8142	0.3425
cg01182585	39.2506	0.0185-83138.2499	0.34761
cg11942662	16.8279	0.046-6150.186	0.34844
cg00158789	1.7453	0.5448-5.5915	0.3485
cg12836643	1.8526	0.5097-6.7341	0.34909
cg12284521	0.5295	0.1398-2.0047	0.34921
cg00542139	0.0024	0-735.4949	0.3495
cg20846728	0.5072	0.1223-2.1042	0.34973
cg12251828	0.6303	0.2393-1.6601	0.3502
cg06941702	3.0337	0.2932-31.3849	0.3519
cg15842898	0.5671	0.1718-1.8724	0.35198
cg24917641	2.4622	0.3691-16.4249	0.35206
cg11532433	1.7907	0.5243-6.116	0.35252
cg12999120	3.1854	0.2767-36.6672	0.35269
cg01305736	3.0461	0.2843-32.6373	0.3573
cg18499339	0.4099	0.0612-2.7428	0.35776
cg00813191	5.2295	0.1539-177.7338	0.3578
cg01196322	2.1193	0.4275-10.5057	0.3578
cg05832853	0.5483	0.1522-1.9749	0.35807
cg16556633	1.9284	0.4717-7.8835	0.36069
cg21523871	2.5284	0.3459-18.4803	0.36074
cg00598429	0.2939	0.021-4.1075	0.36283
cg02395184	0.5073	0.1176-2.1891	0.36298
cg17548556	3.3818	0.2435-46.9638	0.36406
cg06728135	0.5504	0.1515-1.9991	0.36421
cg03914735	2.3262	0.3746-14.4449	0.36488
cg26999505	1.6689	0.5492-5.0712	0.36641
cg27477881	5.9772	0.1233-289.8665	0.36661
cg27275023	1.5946	0.5789-4.3923	0.36674
cg20317272	0.5237	0.1284-2.1356	0.36707
cg10208610	2.06	0.4282-9.9107	0.36721
cg21126573	2.0046	0.4415-9.1011	0.36764
cg05131646	2.1999	0.3945-12.2671	0.36856
cg09980114	5.0145	0.1484-169.386	0.3693
cg07470570	2.2331	0.386-12.9202	0.3697
cg13995140	0.4016	0.0546-2.9524	0.37008
cg13427728	1.8522	0.4795-7.1554	0.37138
cg27282206	0.5599	0.1569-1.9973	0.37138
cg04548463	1.8582	0.477-7.2387	0.37182
cg19925558	3.41	0.2262-51.3979	0.37548
cg13924748	14.6868	0.0372-5792.6081	0.3783
cg00333528	1.8349	0.4752-7.0854	0.37858
cg03224013	0.5557	0.1503-2.0549	0.3786
cg01450303	4.1218	0.1756-96.7615	0.3791
cg12435059	4.2172	0.1673-106.2924	0.38206
cg25438963	1.3929	0.6623-2.9294	0.38234
cg18405341	1.8386	0.4681-7.2206	0.38292
cg04348419	0.0573	1e-04-35.4666	0.38323
cg19241878	1.7159	0.5092-5.7825	0.38371
cg09019546	0.4998	0.105-2.3796	0.38373
cg14476479	1.6873	0.5194-5.4815	0.38421
cg03162506	2.1132	0.3854-11.5882	0.38885
cg22167704	0.5132	0.112-2.3521	0.39041
cg23890469	2.3042	0.3424-15.5045	0.39078
cg26804381	1.8796	0.4446-7.9452	0.3909
cg05211836	1.564	0.5625-4.3489	0.39136
cg25513635	1.5527	0.5677-4.2469	0.3914
cg15797102	0.6048	0.1914-1.9116	0.39177
cg06890415	1.9703	0.4169-9.3117	0.39208
cg08242475	0.5811	0.1674-2.0175	0.39266
cg24156555	2.5236	0.3019-21.0956	0.39285
cg23823894	0.4827	0.0908-2.5663	0.39288
cg12853656	0.5288	0.1219-2.2939	0.39479
cg14429381	2.095	0.3807-11.529	0.39534
cg14767442	0.4906	0.0946-2.5446	0.39649
cg08354165	0.4597	0.076-2.7797	0.39728
cg05251389	1.7875	0.4654-6.8657	0.39758
cg09055943	152.212	0.0013-17641432.1477	0.39829
cg21787280	23.0038	0.0156-34015.5754	0.39978
cg10895886	0.2708	0.0129-5.6867	0.40034
cg19107511	1.872	0.4341-8.0724	0.4004
cg15845821	2.2723	0.3348-15.4222	0.40087
cg03895094	0.2357	0.0081-6.8897	0.40136
cg09027472	1.9364	0.4113-9.1156	0.40313
cg20091591	1.8185	0.4465-7.4071	0.40394
cg14683378	0.3666	0.0341-3.9419	0.40765
cg01709677	0.5173	0.1086-2.4637	0.40786
cg25323711	5.0222	0.1079-233.6754	0.4101
cg06742228	35.2995	0.0072-172583.5625	0.41092
cg01178924	2.0262	0.3762-10.9121	0.41108
cg23106940	2.6862	0.2544-28.3641	0.41127
cg08354106	3.4135	0.1811-64.3512	0.41254
cg03465714	0.5624	0.1419-2.2288	0.41266
cg19759923	4.0255	0.1436-112.8391	0.41286
cg13053563	0.6001	0.1766-2.0394	0.41327
cg03635863	0.6958	0.2917-1.6596	0.41349
cg00999623	3.2825	0.1897-56.796	0.41384
cg25305993	0.6038	0.1796-2.03	0.41479
cg12434571	1.5138	0.5572-4.1124	0.41616
cg03737788	0.5306	0.1149-2.4492	0.4167
cg04454571	1.9875	0.3779-10.4534	0.41738
cg16581455	1.6966	0.4728-6.0885	0.41746
cg18973101	0.6085	0.1829-2.0246	0.41798
cg26596307	1.9352	0.3911-9.5759	0.41836
cg16002248	2.4725	0.2754-22.1978	0.41886
cg22687211	0.5845	0.1586-2.1548	0.41985
cg02078164	1.4511	0.5871-3.5863	0.41999
cg19210302	0.1079	5e-04-24.5962	0.42154
cg11163383	5.5488	0.0842-365.5688	0.42257
cg23527902	1.6976	0.4646-6.2033	0.42346
cg00114966	1.8896	0.3962-9.0124	0.42467
cg23534245	2.0486	0.3489-12.0269	0.42714
cg15717448	1.9154	0.3843-9.5454	0.42773
cg15204286	0.5888	0.1568-2.2107	0.4326
cg09405635	1.5128	0.5379-4.2545	0.43265
cg16568360	1.8184	0.4083-8.0993	0.43272
cg05007549	1.7213	0.4415-6.7115	0.43408
cg19869037	1.598	0.4925-5.1851	0.43505
cg21188454	0.0253	0-259.0924	0.43516
cg07033286	1.909	0.3762-9.6874	0.43524
cg22747650	2.3837	0.268-21.1971	0.43592
cg14696870	0.73	0.3307-1.6114	0.436
cg25562059	1.6746	0.4563-6.1458	0.43708
cg10375267	1.6087	0.4846-5.3397	0.43736
cg14442061	0.2165	0.0045-10.4257	0.43892
cg02068690	2.0919	0.3226-13.5634	0.43901
cg11225528	1.8589	0.3866-8.9395	0.43908
cg20321801	1.819	0.3982-8.3094	0.44013
cg22092397	0.6459	0.2128-1.9609	0.44043
cg05408203	0.6115	0.1752-2.1348	0.44068
cg02854331	0.4119	0.043-3.9415	0.44146
cg15352562	1.7292	0.4284-6.9797	0.44171
cg14183712	0.6143	0.1771-2.1316	0.44275
cg15547734	0.6178	0.1806-2.1136	0.44287
cg08896942	0.5094	0.0909-2.8541	0.44295
cg18965659	13.25	0.0176-9963.4085	0.44443
cg20661303	2.0171	0.3335-12.2018	0.44482
cg13165753	3.0522	0.1742-53.486	0.44502
cg12755471	1.6682	0.4484-6.2068	0.44523
cg03161410	2.2228	0.2842-17.3845	0.44657
cg08527566	16.4725	0.012-22543.8426	0.44702
cg26059973	0.0511	0-112.4025	0.44875
cg20902758	2.0086	0.3304-12.2096	0.44879
cg21113603	0.6296	0.19-2.086	0.44908
cg14659511	0.5561	0.1215-2.5461	0.44971
cg19998073	0.5305	0.1025-2.745	0.44973
cg17899889	0.606	0.1653-2.2211	0.44975
cg09367901	1.4652	0.5427-3.9562	0.45095
cg17271585	1.7533	0.4063-7.5662	0.45169
cg23854009	0.3821	0.0308-4.7402	0.45397
cg27378216	0.6402	0.1989-2.0607	0.45465
cg24694502	0.6816	0.2492-1.8639	0.45518
cg14679780	1.4371	0.5531-3.7339	0.45661
cg24017995	2.0757	0.3023-14.2541	0.45755
cg00876191	8.6414	0.029-2574.2164	0.45811
cg02023367	0.5186	0.0913-2.9451	0.45867
cg04100307	0.5194	0.0906-2.9774	0.46219
cg05325567	0.4307	0.0452-4.1074	0.46412
cg23451678	1.3786	0.583-3.2596	0.46467
cg24591573	0.5102	0.0838-3.1075	0.46542
cg26023709	0.583	0.1368-2.4844	0.46565
cg23374376	8.9089	0.0248-3195.6655	0.46619
cg13906733	50.3249	0.0013-1905341.4814	0.46628
cg25027584	0.5947	0.1469-2.4072	0.46633
cg05598010	1.8982	0.3373-10.6809	0.46715
cg11498870	0.7219	0.2994-1.7403	0.46789
cg06784218	1.8475	0.3511-9.7217	0.46876
cg08373610	1.4877	0.5047-4.3853	0.47141
cg09462956	0.6096	0.1584-2.3457	0.47156
cg21203775	0.4999	0.0756-3.3049	0.47181
cg11832020	0.4792	0.0645-3.5593	0.4721
cg04404455	0.7154	0.2869-1.7841	0.47254
cg05440642	1.7016	0.3978-7.2799	0.47349
cg23674169	1.5421	0.4716-5.0431	0.47367
cg11155172	5.4465	0.0528-562.0681	0.47369
cg12111808	0.45	0.0506-4.0012	0.47383
cg27619840	0.6262	0.1738-2.2569	0.47427
cg11344574	0.7038	0.268-1.8483	0.47579
cg08147886	19.6028	0.0055-70474.6891	0.47625
cg20674248	0.6918	0.2509-1.9077	0.47651
cg01175433	0.5962	0.1433-2.4803	0.47703
cg19562854	20.0917	0.0051-79038.8529	0.47744
cg19700470	0.5054	0.0768-3.3241	0.47765
cg18396403	0.5419	0.0997-2.946	0.47818
cg09567173	2.675	0.1761-40.6326	0.47842
cg05175020	1.2746	0.6515-2.4937	0.47859
cg23156475	3711.38	0-27941189991548.9	0.47873
cg18749617	1.7325	0.3784-7.9319	0.47894
cg00561287	1.5341	0.4661-5.0495	0.48137
cg06795634	0.5177	0.0824-3.2524	0.48257
cg16071713	1.5533	0.4527-5.3297	0.4839
cg13566430	1.5056	0.4783-4.7394	0.48434
cg09626867	1.4342	0.521-3.9479	0.4852
cg07483065	0.6307	0.1725-2.3053	0.48579
cg08169409	5.394	0.046-632.0579	0.48806
cg19854301	0.5561	0.1057-2.9254	0.48843
cg08275638	1.4979	0.4752-4.7217	0.49035
cg02802289	0.6207	0.1598-2.4115	0.49098
cg05695991	1.8973	0.3066-11.7396	0.49101
cg06570025	1.5588	0.4395-5.5285	0.49196
cg13600632	2.9061	0.1374-61.4744	0.49326
cg03374976	1.9765	0.281-13.9015	0.49359
cg10649525	0.7381	0.309-1.7634	0.49436
cg00407413	1.9235	0.294-12.5853	0.49488
cg21945686	0.5005	0.0685-3.659	0.49531
cg23441641	2.1893	0.2301-20.8298	0.49541
cg16027132	1.7104	0.3647-8.0214	0.49606
cg25402137	1.707	0.3653-7.9773	0.49668
cg23992209	0.7087	0.2617-1.9198	0.49832
cg25123308	8.5546	0.017-4298.0459	0.49877
cg03571764	0.5442	0.0931-3.1797	0.49934
cg21840908	2.3358	0.199-27.4135	0.49956
cg17923377	0.5006	0.0671-3.7325	0.49965
cg25207127	0.5368	0.0881-3.2709	0.49988
cg05474467	86.6957	2e-04-37406796.403	0.50026
cg09826895	1.5693	0.4225-5.8283	0.50088
cg21824300	0.7242	0.2825-1.8565	0.50173
cg11741485	0.4678	0.0504-4.3418	0.5039
cg26233832	0.694	0.2366-2.0359	0.50594
cg19723734	1.5821	0.4091-6.1183	0.50615
cg27476279	1.7722	0.3274-9.5923	0.50658
cg12369091	0.6102	0.1419-2.6242	0.5069
cg08229905	0.319	0.0109-9.3303	0.50711
cg02598319	0.7606	0.3387-1.7081	0.50734
cg18197795	2.9878	0.1174-76.0121	0.50743
cg26993940	0.4906	0.0596-4.0358	0.50774
cg12182343	1.4907	0.4571-4.8621	0.50802
cg16922688	0.4178	0.0314-5.5583	0.50865
cg04672026	0.5626	0.1019-3.1046	0.50924
cg19645299	1.6451	0.375-7.2164	0.50931
cg15763670	1.4531	0.4788-4.4105	0.50942
cg04665180	6.409	0.0255-1609.5124	0.50997
cg02373493	0.6362	0.1648-2.4564	0.51176
cg26170014	0.613	0.1421-2.6455	0.51188
cg01233664	1.6021	0.3914-6.5582	0.5122
cg21504624	1.8189	0.3039-10.8868	0.51227
cg05157371	1.728	0.3361-8.8832	0.51261
cg10963543	0.6164	0.1446-2.6275	0.5131
cg10677372	0.7196	0.2683-1.9298	0.51323
cg26876637	0.4621	0.0455-4.6956	0.51402
cg15912031	1.8087	0.3046-10.7379	0.51437
cg26771969	1.9953	0.2497-15.9444	0.51474
cg06469895	1.9616	0.2581-14.9089	0.515
cg17676765	3.9085	0.063-242.3981	0.51743
cg10227830	1.6105	0.38-6.8262	0.51779
cg06757138	0.4109	0.0275-6.1488	0.51936
cg22603934	0	0-11910886501.1366	0.51964
cg24965187	0.5965	0.1238-2.8748	0.51966
cg25067245	1.4682	0.4554-4.7338	0.52027
cg18278424	1.6222	0.3711-7.0917	0.52035
cg01359748	0.5595	0.0949-3.2976	0.52114
cg25545394	0.0705	0-233.5132	0.52134
cg10494703	1.9225	0.2588-14.2783	0.5229
cg01109243	50.4047	3e-04-8574463.537	0.52353
cg05748796	1.4424	0.4674-4.4514	0.52406
cg01001314	0.6699	0.1952-2.299	0.52429
cg19760458	0.6849	0.2086-2.2495	0.53281
cg27553926	1.2626	0.6067-2.6275	0.53292
cg21195235	1.4893	0.4257-5.2094	0.53303
cg19435526	1.796	0.2846-11.3327	0.53326
cg13116478	14.0311	0.0035-57000.0978	0.53329
cg11635053	1.8032	0.2821-11.5262	0.53335
cg06048102	1.7252	0.3097-9.6107	0.53372
cg03156651	1.9376	0.24-15.6432	0.53478
cg02909206	0.5418	0.078-3.7639	0.53543
cg08602689	0.4637	0.0395-5.4387	0.54065
cg23871933	37.3963	3e-04-4191283.2659	0.54154
cg12410310	1.6457	0.3315-8.169	0.54224
cg26744084	0.5387	0.0737-3.9396	0.54229
cg21249708	2.7224	0.1084-68.4031	0.54261
cg18181196	1.4871	0.414-5.3418	0.54304
cg20632873	0.2032	0.0012-34.5189	0.54307
cg15058557	1.7975	0.2703-11.9532	0.54409
cg16235008	8.5409	0.0083-8778.0022	0.5444
cg19601144	1.5914	0.3531-7.1716	0.54528
cg23660866	0.7126	0.2359-2.153	0.54808
cg13899293	0.5968	0.1107-3.2177	0.54823
cg03742137	0.6902	0.2057-2.3158	0.54825
cg09985745	0.5302	0.0668-4.2091	0.54837
cg01230243	4.4912	0.0331-610.1515	0.54889
cg03738579	8.3401	0.008-8658.998	0.54946
cg17166812	1.7189	0.2911-10.1491	0.54991
cg06733736	0.1319	2e-04-103.3782	0.55135
cg18617808	1.5591	0.3606-6.7404	0.55215
cg05756754	1.4943	0.3931-5.6805	0.5555
cg23513727	1.9967	0.1996-19.9766	0.5562
cg01823161	1.4996	0.3877-5.7996	0.55714
cg00025405	0.7105	0.227-2.2245	0.55729
cg08726667	1.4306	0.4322-4.7355	0.55769
cg10215763	0.7464	0.2806-1.9855	0.55795
cg08798701	3.2292	0.0634-164.4495	0.55884
cg14407987	1.5108	0.3778-6.0417	0.55953
cg09811860	1.5642	0.3438-7.1163	0.56276
cg19372359	0.6692	0.1714-2.6126	0.56322
cg11137578	1.5075	0.3667-6.197	0.56927
cg20306265	0.6268	0.1254-3.1326	0.56931
cg02865101	0.6834	0.1839-2.5389	0.56968
cg23262030	28.7755	3e-04-3085296.7032	0.56971
cg15616511	1.7539	0.2518-12.2141	0.57046
cg00514609	0.79	0.3493-1.7867	0.5713
cg04498679	1.4521	0.3977-5.3023	0.57243
cg00832923	0.7427	0.2643-2.087	0.57259
cg20303331	0.6629	0.1571-2.7977	0.57574
cg06088032	0.6794	0.1747-2.6422	0.57699
cg14844815	0.7533	0.2778-2.0431	0.57791
cg09791673	1.44	0.3962-5.2336	0.57972
cg17993313	0.6953	0.1916-2.5226	0.58046
cg12486498	2.2542	0.1253-40.5516	0.58144
cg21774863	20.1679	5e-04-890053.5856	0.58195
cg00253681	1.6773	0.2658-10.5846	0.58214
cg14111380	1.6922	0.2569-11.1461	0.58444
cg18144404	1.5108	0.3442-6.632	0.58453
cg22664368	2.8895	0.064-130.4368	0.58515
cg20731804	3.131	0.052-188.5976	0.58517
cg15476790	1.4949	0.3501-6.3826	0.58718
cg02072589	0.6888	0.1782-2.6626	0.58894
cg20710902	1.5181	0.3325-6.9316	0.59005
cg25969082	1.6316	0.274-9.7175	0.59073
cg06951326	0.6726	0.1583-2.8574	0.59098
cg04108438	1.6605	0.2596-10.6207	0.5922
cg07061145	2.0497	0.1481-28.3691	0.59241
cg21441657	1.7505	0.2243-13.662	0.5933
cg01297808	1.3253	0.4714-3.726	0.59331
cg21170029	1.8328	0.1965-17.0961	0.5949
cg24871089	1.3019	0.4909-3.4523	0.59602
cg01191058	0.7969	0.344-1.8461	0.59641
cg00011605	1.5574	0.3019-8.0341	0.59664
cg06890161	0.6505	0.1309-3.232	0.59905
cg19964273	0.6602	0.14-3.1129	0.59977
cg04345118	1.5348	0.3083-7.6406	0.60086
cg25426807	0.7676	0.2838-2.0765	0.60243
cg13623638	0.7457	0.2469-2.2515	0.60269
cg01130192	0.3221	0.0045-22.9991	0.60294
cg14159522	3.294	0.0367-295.4246	0.60331
cg25256538	2.439	0.0837-71.0482	0.60428
cg15885301	0.6846	0.1632-2.8719	0.60447
cg06612016	1.2703	0.5137-3.1415	0.6045
cg01842807	0.7658	0.2783-2.1069	0.60528
cg11977562	2.3577	0.0911-60.9826	0.60532
cg14032244	2.1495	0.1176-39.2722	0.60569
cg09230014	1.4058	0.382-5.1729	0.60836
cg12896146	0.5283	0.0459-6.0758	0.60861
cg06772295	0.3771	0.009-15.7764	0.60866
cg20900927	0.6422	0.1177-3.5049	0.60904
cg12179023	0.5243	0.0439-6.2655	0.60998
cg24583966	1.4424	0.3512-5.9245	0.6113
cg14752838	1.2074	0.5828-2.5018	0.61203
cg09934926	1.3238	0.4473-3.9177	0.61232
cg12981272	1.6743	0.2263-12.3898	0.61377
cg08356028	1.3242	0.4442-3.9476	0.61435
cg01271641	255.099	0-587837819682.587	0.61439
cg11555257	1.7371	0.2021-14.9345	0.61491
cg00342530	1.6677	0.2239-12.424	0.61768
cg11285284	0.6263	0.0996-3.9367	0.61784
cg08721876	0.7846	0.3022-2.0374	0.61836
cg18327157	0.6787	0.1476-3.1216	0.6186
cg18685034	1.5255	0.2874-8.0982	0.61999
cg19514905	0.6535	0.1206-3.5415	0.62179
cg00534540	1.5184	0.2863-8.0542	0.62371
cg17995495	0.7558	0.2468-2.3149	0.62402
cg04653913	1.3483	0.4066-4.4716	0.62513
cg18187029	1.5947	0.2449-10.3836	0.6254
cg03400374	0.7273	0.202-2.6182	0.62607
cg10833826	9.0624	0.0012-66748.2779	0.62757
cg10730165	0.805	0.3351-1.9343	0.62776
cg09513629	0.6902	0.1525-3.1251	0.63042
cg15408407	3.4686	0.0216-557.576	0.63132
cg12184157	1.3048	0.4386-3.8817	0.6324
cg10174213	2.0164	0.1119-36.3384	0.63453
cg04461050	1.98	0.1184-33.1237	0.63461
cg23724738	0.7775	0.2749-2.1989	0.6352
cg20309640	1.386	0.3598-5.3388	0.63523
cg20291779	1.6	0.2277-11.2449	0.63663
cg12370326	0.6769	0.1336-3.4298	0.63738
cg04066686	0.5079	0.0302-8.5404	0.63803
cg00084094	1.3181	0.4135-4.2011	0.64053
cg11697861	0.4438	0.0145-13.5769	0.64159
cg15690696	0.734	0.1982-2.7178	0.64335
cg22295435	1.3562	0.3705-4.9639	0.64533
cg26251865	0.7097	0.1637-3.0769	0.64678
cg16145113	1.2895	0.4335-3.8354	0.64759
cg20630647	0.7319	0.1906-2.8102	0.6493
cg12140527	0.4641	0.0169-12.7743	0.6499
cg26047334	0.7635	0.2376-2.4533	0.65048
cg15729964	1.4972	0.2604-8.6097	0.65113
cg20685139	1.7114	0.1604-18.2635	0.65647
cg18449050	0.7741	0.2499-2.3977	0.6571
cg22237346	0.5664	0.0459-6.989	0.65749
cg20377955	1.2921	0.4125-4.0469	0.65999
cg27113015	1.3688	0.3368-5.5622	0.66077
cg14397918	1.3774	0.3258-5.8231	0.66337
cg11320318	1.286	0.4142-3.993	0.66347
cg00598747	4.3169	0.0057-3257.9059	0.66531
cg01710886	0.512	0.0246-10.6683	0.66571
cg09440986	0.7669	0.2299-2.5583	0.66596
cg25383479	1.2828	0.413-3.9841	0.66671
cg22025570	0.8021	0.2931-2.1951	0.66764
cg02482346	1.5427	0.2129-11.1773	0.66786
cg23363754	1.2116	0.5039-2.9129	0.66804
cg12876900	1.5474	0.209-11.4588	0.66913
cg07230062	0.7884	0.2628-2.3646	0.67132
cg11906829	0.8297	0.3492-1.9712	0.67237
cg19713609	18.9859	0-16200172.5626	0.67269
cg02433545	0.6665	0.1014-4.3794	0.67272
cg16419421	1.3809	0.3085-6.1815	0.67299
cg05722611	0.0208	0-1343100.3049	0.6731
cg01416241	0.2972	0.001-89.6589	0.677
cg08822523	0.7779	0.2385-2.5375	0.67712
cg24397084	1.7413	0.1279-23.7093	0.67719
cg17487705	0.7501	0.1935-2.9083	0.67747
cg27609721	1.8239	0.1068-31.1587	0.67812
cg27640302	1.4855	0.2292-9.6288	0.67812
cg23202887	0.7755	0.2334-2.5772	0.67819
cg18132212	0.5063	0.0201-12.7305	0.6791
cg18764516	4.219	0.0046-3895.8727	0.67944
cg07949028	0.7352	0.1707-3.166	0.67963
cg08780218	1.2513	0.4315-3.6288	0.67988
cg23990272	1.7973	0.1105-29.2318	0.68032
cg17972625	1.4065	0.2774-7.1301	0.68044
cg26504529	1.4346	0.2574-7.9969	0.68058
cg03969301	1.484	0.226-9.7464	0.68101
cg16914425	1.3022	0.3665-4.6268	0.68309
cg06702537	1.3937	0.2831-6.8607	0.68314
cg00974523	1.3758	0.2921-6.4799	0.68658
cg16919449	1.2531	0.4172-3.7631	0.68763
cg10945695	0.8024	0.2739-2.3506	0.68804
cg04550712	0.7262	0.1504-3.5065	0.69041
cg02749511	1.3991	0.268-7.3043	0.69043
cg21956099	1.4074	0.2613-7.5791	0.69078
cg13028376	1.8474	0.088-38.7918	0.69272
cg23963802	1.3385	0.3135-5.7136	0.69381
cg26405376	1.2102	0.4671-3.1355	0.69453
cg00667789	0.6782	0.097-4.7443	0.69564
cg15908367	1.1348	0.5991-2.1496	0.69792
cg20662169	0.8006	0.2602-2.4637	0.6982
cg04087039	1.2519	0.4019-3.8994	0.69832
cg23047671	0.7749	0.2115-2.8388	0.70031
cg06691490	0.5819	0.0369-9.1715	0.70038
cg11821637	1.2765	0.3656-4.4571	0.70196
cg11279163	1.3085	0.33-5.1877	0.70205
cg08192683	0.811	0.2768-2.376	0.70251
cg20545224	1.5511	0.1612-14.9228	0.70395
cg13565994	1.2845	0.3515-4.6934	0.7049
cg13436055	1.4848	0.1905-11.5699	0.70593
cg20181180	0.7725	0.202-2.9547	0.70606
cg26976390	2.5566	0.0194-337.7401	0.70638
cg26826957	1.2888	0.3429-4.844	0.70723
cg04962978	0.7391	0.1516-3.6032	0.70836
cg17226534	1.4468	0.2083-10.0474	0.70875
cg02355183	0.8058	0.2595-2.502	0.70879
cg19975933	0.6939	0.1019-4.7247	0.70884
cg11803278	0.8249	0.2988-2.2773	0.71031
cg02582940	1.2851	0.3404-4.8523	0.71131
cg10179330	0.783	0.2141-2.8632	0.71149
cg20131297	1.3092	0.3062-5.5976	0.71625
cg12027899	1.5598	0.1414-17.2061	0.71664
cg22556768	1.7068	0.0947-30.7736	0.7171
cg06930856	0.7907	0.2203-2.8379	0.71869
cg25216039	1.3903	0.2309-8.3695	0.71903
cg09490124	0.813	0.2631-2.5127	0.71918
cg00026327	1.2884	0.3206-5.1775	0.72106
cg19694770	1.3623	0.2479-7.4849	0.72209
cg07899016	1.281	0.3262-5.0311	0.72276
cg26262055	1.2436	0.3661-4.2246	0.72674
cg08606655	0.1112	0-26036.1055	0.72771
cg13490422	1.2045	0.4198-3.4557	0.72937
cg03071143	1.8749	0.0529-66.5042	0.72995
cg11253886	0.7582	0.156-3.6844	0.73144
cg03732014	1.2729	0.3203-5.0593	0.73178
cg23300257	0.6914	0.0834-5.734	0.73238
cg19390271	1.2463	0.3514-4.4206	0.73325
cg21238818	0.7879	0.1997-3.1085	0.73349
cg04544533	1.5905	0.1096-23.0861	0.73387
cg18588934	1.4562	0.1649-12.8569	0.73519
cg18052528	1.3241	0.2602-6.7376	0.73521
cg19091245	1.3666	0.219-8.5293	0.73816
cg07173635	1.1888	0.4307-3.281	0.73848
cg09293560	0.7745	0.1724-3.4796	0.73888
cg02310103	1.3282	0.2479-7.1172	0.74037
cg07356957	1.2884	0.2861-5.8022	0.74132
cg03653377	0.7909	0.1952-3.2044	0.7425
cg04568121	0.7996	0.2092-3.0565	0.74373
cg08903465	1.3937	0.1893-10.2615	0.74452
cg06847624	1.1439	0.5082-2.5747	0.74532
cg01511682	2.7271	0.0063-1175.9203	0.74585
cg16504641	0.1482	0-16498.0879	0.74741
cg19738802	1.2423	0.3272-4.716	0.74995
cg19558214	1.419	0.1647-12.2282	0.75013
cg06123807	3.8207	0.001-14873.6428	0.75064
cg02771260	0.8364	0.2771-2.5248	0.75127
cg06863619	0.6391	0.0397-10.2782	0.75211
cg03517923	1.2969	0.2584-6.5088	0.75213
cg10184431	1.1711	0.4392-3.1228	0.75223
cg08093619	0.7607	0.138-4.1929	0.75349
cg14752139	0.7187	0.0896-5.7628	0.75581
cg04132891	0.7874	0.1745-3.5537	0.75592
cg17359753	1.2452	0.3117-4.9739	0.75634
cg13369534	0.7887	0.176-3.5333	0.75637
cg24646841	0.8587	0.3276-2.2508	0.75662
cg08877322	1.3646	0.1906-9.7697	0.75691
cg01617520	0.8124	0.2177-3.0321	0.7572
cg20565090	0.7265	0.0951-5.5483	0.75803
cg23726483	0.7577	0.1296-4.4303	0.75809
cg00653615	1.2212	0.3413-4.3692	0.7587
cg03542686	1.357	0.1894-9.7202	0.76122
cg10174683	1.5217	0.1006-23.0264	0.76197
cg02916816	1.1792	0.4051-3.4324	0.76241
cg09645574	0.8753	0.3674-2.0857	0.76376
cg16618493	1.2704	0.2661-6.0646	0.76415
cg27110132	2.6595	0.0042-1681.501	0.76627
cg04869269	0.7464	0.1061-5.251	0.76886
cg14531530	0.5019	0.005-50.2526	0.76929
cg15242223	1.2065	0.3394-4.2886	0.7717
cg05195085	1.3405	0.1851-9.7057	0.77171
cg04956362	0.7565	0.1129-5.069	0.77374
cg10258271	0.7631	0.1197-4.864	0.77481
cg09238957	1.4677	0.1055-20.4254	0.77519
cg26337390	0.8214	0.2129-3.1689	0.77519
cg19744326	0.7019	0.0611-8.0675	0.77629
cg23276524	0.6869	0.0505-9.3355	0.77786
cg01462349	0.8139	0.1942-3.4106	0.77821
cg24475210	0.3742	4e-04-377.566	0.78061
cg25703567	0.8081	0.18-3.6273	0.78092
cg26913833	1.3343	0.1741-10.2257	0.78137
cg27525524	0.8411	0.2464-2.8715	0.78234
cg15674432	1.2294	0.2801-5.396	0.7843
cg02221347	4.5654	1e-04-241355.2489	0.78434
cg20660350	1.296	0.2003-8.3835	0.78549
cg14211350	1.2763	0.2202-7.3966	0.78552
cg16367697	0.8378	0.2322-3.0234	0.78697
cg23300543	0.2911	0-2260.1729	0.78711
cg25264630	0.8808	0.3504-2.2142	0.78733
cg08369580	0.4013	5e-04-317.6818	0.78858
cg07251603	7.058	0-11489687.8038	0.78886
cg07511259	0.8394	0.232-3.0365	0.78953
cg24134292	1.1725	0.363-3.7871	0.79019
cg14658290	1.2839	0.2012-8.1933	0.79159
cg26990406	0.7698	0.1102-5.3784	0.79199
cg01827098	0.8438	0.2375-2.9977	0.7929
cg23724935	1.2099	0.2898-5.0508	0.79388
cg21386795	0.3963	3e-04-463.9686	0.79735
cg01512589	1.3377	0.1442-12.4059	0.79793
cg00924855	1.2754	0.196-8.3009	0.79906
cg10473842	0.8711	0.3005-2.5252	0.79942
cg22752008	1.4915	0.0682-32.6102	0.79948
cg13519194	1.2703	0.1993-8.0973	0.80015
cg06927900	0.7812	0.1142-5.3441	0.80127
cg22753482	0.7486	0.0782-7.1643	0.80159
cg02470858	1.2177	0.2612-5.6756	0.802
cg01612936	0.8252	0.1815-3.7528	0.80368
cg23220435	0.8437	0.2204-3.2299	0.80399
cg00658151	1.1894	0.3019-4.6867	0.80417
cg15015340	1.1476	0.3794-3.4708	0.80743
cg23235223	0.8585	0.249-2.9608	0.80919
cg20712263	0.7461	0.0692-8.0466	0.80928
cg06855497	1.2012	0.2668-5.4083	0.81127
cg13007502	0.9122	0.4289-1.94	0.81139
cg23878404	0.8676	0.2683-2.8061	0.81259
cg06360465	0.87	0.2747-2.7552	0.81286
cg00231771	1.2573	0.1879-8.4129	0.81333
cg19903196	1.1573	0.3355-3.9922	0.81712
cg12980549	1.1295	0.4009-3.1819	0.8178
cg08030282	1.2209	0.2235-6.6703	0.81782
cg08450080	1.1799	0.2802-4.9682	0.82152
cg26217318	0.8245	0.1528-4.4507	0.82253
cg02281489	0.8057	0.1185-5.4769	0.82514
cg25951580	2.8723	2e-04-34918.3036	0.82598
cg18891604	1.2485	0.1712-9.1031	0.8267
cg13204977	1.2358	0.183-8.344	0.82801
cg06202585	1.1054	0.447-2.7337	0.82823
cg02365862	3.0127	1e-04-64244.0151	0.82832
cg25187227	1.4608	0.0471-45.3325	0.82882
cg02736230	0.8528	0.191-3.8069	0.83471
cg27575890	0.825	0.1327-5.1306	0.83656
cg09645138	1.2767	0.1251-13.0261	0.83669
cg11401957	0.872	0.2371-3.2076	0.8367
cg13071208	1.1916	0.2241-6.3363	0.83706
cg25029529	1.1042	0.428-2.8487	0.83759
cg18493804	0.8925	0.2974-2.6781	0.8392
cg00214504	0.803	0.0959-6.7227	0.8396
cg14917846	1.1447	0.3037-4.3146	0.84182
cg08384239	1.1776	0.2298-6.0349	0.84459
cg08606075	0.4235	1e-04-2295.1535	0.84471
cg04059197	1.1754	0.2323-5.9483	0.84513
cg00153856	1.4076	0.0448-44.2573	0.8459
cg06899799	1.1904	0.1869-7.5813	0.85359
cg06820286	1.7462	0.0047-652.5271	0.85366
cg20671649	1.1349	0.2956-4.3568	0.85371
cg06142621	0.8763	0.2145-3.5803	0.85406
cg20546263	0.8462	0.1412-5.0695	0.85493
cg15927295	1.4501	0.0252-83.5345	0.8574
cg22619376	0.8813	0.2205-3.5223	0.85808
cg14162940	0.8589	0.1602-4.6046	0.85908
cg18098567	0.8778	0.2057-3.7458	0.86027
cg23426231	0.8421	0.1241-5.7127	0.86032
cg18303477	0.8812	0.2153-3.6077	0.86044
cg03571393	1.1273	0.2962-4.2898	0.86049
cg12393503	2.0839	5e-04-8029.0964	0.86163
cg10235656	0.132	0-3230822900.4065	0.86821
cg15139182	0.8805	0.1946-3.9843	0.86881
cg26738880	0.9098	0.2958-2.7985	0.86902
cg13663644	0.9285	0.3829-2.2515	0.86958
cg27367512	0.8205	0.0763-8.8208	0.87027
cg10062919	1.1369	0.2406-5.372	0.8714
cg24116513	0.9096	0.2884-2.8692	0.87161
cg04960880	0.8287	0.0823-8.3422	0.87332
cg20544372	0.9317	0.3849-2.2558	0.87547
cg13724182	0.86	0.1282-5.7685	0.87657
cg17014264	0.8996	0.2358-3.4316	0.87688
cg13224213	0.8758	0.162-4.7344	0.87755
cg02144647	1.1518	0.1887-7.0289	0.87829
cg25005739	1.1063	0.2978-4.11	0.88005
cg07690326	0.9037	0.2394-3.4108	0.8812
cg16359370	1.1792	0.1353-10.2796	0.88138
cg03894033	0.249	0-30720167.0199	0.88373
cg02252795	0.8582	0.11-6.6924	0.88395
cg08735710	0.8859	0.1655-4.7409	0.88739
cg06350404	0.6792	0.0032-143.9043	0.88743
cg22637538	0.8719	0.1275-5.9605	0.88885
cg05265975	2.0684	0-129160.5108	0.89736
cg18436324	0.6713	0.0015-295.9286	0.89791
cg00713214	0.9385	0.3486-2.5269	0.90005
cg16916549	0.9448	0.3889-2.2952	0.90024
cg05262711	1.1415	0.1397-9.3295	0.90176
cg02161534	1.1262	0.1626-7.7985	0.90416
cg19452853	1.1369	0.1357-9.5269	0.9058
cg26817827	0.8868	0.1174-6.7009	0.90731
cg19027361	1.1104	0.1868-6.601	0.90836
cg04353359	1.0894	0.253-4.6897	0.90851
cg08880064	0.8583	0.0624-11.8096	0.90904
cg01261797	0.9339	0.2863-3.0471	0.9098
cg11215644	1.0885	0.2463-4.8107	0.91095
cg22849541	1.094	0.2228-5.3717	0.91191
cg02234489	0.9325	0.2626-3.3108	0.9139
cg21941821	1.0981	0.1997-6.0389	0.91433
cg13544966	1.0857	0.2425-4.8607	0.9144
cg02592239	0.9444	0.3297-2.7054	0.91514
cg23956844	0.7703	0.0058-102.0086	0.91663
cg12083232	1.1279	0.1182-10.7673	0.91671
cg19814116	1.0737	0.2816-4.0936	0.91706
cg27093361	0.9193	0.1859-4.5458	0.91785
cg00603428	0.4811	0-776101.264	0.92009
cg10047173	0.9154	0.1621-5.1708	0.9203
cg12145349	0.8631	0.0478-15.5983	0.9206
cg27174441	0.9104	0.1397-5.9336	0.92183
cg03373442	0.7793	0.0043-142.422	0.92523
cg02228185	1.0569	0.3317-3.3676	0.92538
cg05897316	1.0834	0.1917-6.1245	0.92774
cg06080893	1.7238	0-638618.0198	0.93367
cg13522406	0.9444	0.2451-3.6386	0.93369
cg19185414	1.0484	0.3342-3.2885	0.93544
cg15507334	0.9183	0.1147-7.3501	0.93598
cg05504759	1.0543	0.2895-3.8399	0.93612
cg09276978	0.929	0.1425-6.0563	0.93859
cg06668724	1.1784	0.0178-78.1241	0.93884
cg25578949	1.0594	0.2235-5.0221	0.9421
cg17318863	1.0588	0.2227-5.0345	0.94277
cg15989525	0.9372	0.1574-5.5799	0.94322
cg02016195	1.0468	0.2643-4.1452	0.94808
cg03050669	0.9404	0.1453-6.0866	0.94855
cg04895475	0.9528	0.2124-4.2743	0.94967
cg15697575	1.0607	0.1658-6.7856	0.95037
cg26048101	0.9593	0.2308-3.988	0.95444
cg14082963	0.9139	0.0379-22.063	0.95579
cg10001546	0.9145	0.0361-23.1725	0.95678
cg22462235	1.0496	0.1789-6.1599	0.9572
cg27161550	1.0658	0.1024-11.0923	0.95745
cg13604166	0.9607	0.208-4.4375	0.95906
cg18889973	0.9729	0.3273-2.8917	0.96059
cg00537335	1.0306	0.2958-3.5908	0.96224
cg23072029	1.1425	0.0046-283.6085	0.96224
cg20129782	0.9663	0.2215-4.2149	0.96359
cg00524220	1.0246	0.3596-2.9196	0.96375
cg07927098	0.97	0.2333-4.0321	0.96656
cg18413449	1.0265	0.2841-3.7081	0.96822
cg24904145	0.9712	0.1955-4.8256	0.97151
cg09537551	1.0155	0.4342-2.3754	0.97163
cg24231002	1.0865	0.0085-139.6357	0.97329
cg18948899	1.0307	0.1727-6.1507	0.97353
cg07794628	0.9542	0.0587-15.5179	0.97371
cg21652192	0.9572	0.0699-13.1046	0.97387
cg10625705	1.042	0.079-13.7386	0.97504
cg10361589	0.9677	0.1183-7.9194	0.9756
cg03943605	1.028	0.1184-8.9235	0.98004
cg24983189	0.9847	0.2918-3.3227	0.98014
cg02341264	1.0106	0.4132-2.4715	0.98159
cg04695436	1.1356	0-63339.5028	0.98181
cg20288129	0.9688	0.0474-19.8216	0.9836
cg09293488	1.0095	0.3434-2.968	0.98622
cg04190119	1.0152	0.1358-7.5913	0.98828
cg04172795	0.9967	0.113-8.7916	0.99765
cg22385579	0.9987	0.2597-3.8407	0.99846
cg00861772	1	0.1352-7.3987	0.99998
